1

2 Venous activation of MEK/ERK drives development of arteriovenous malformation and blood  
3 flow anomalies with loss of Rasa1

4

5 Jasper Greysson-Wong<sup>1,2</sup>, Rachael Rode<sup>1,3</sup>, Jae-Ryeon Ryu<sup>1,2</sup>, Kristina D. Rinker<sup>1,3</sup> and Sarah J.  
6 Childs<sup>1,2,\*</sup>

7

8

9 \* Corresponding author

10 [schild@ucalgary.ca](mailto:schild@ucalgary.ca)

11 403-220-8277

12

13

14 1. Alberta Children's Hospital Research Institute

15 2. Department of Biochemistry and Molecular Biology

16 3. Department of Chemical and Petroleum Engineering

17 University of Calgary,

18 3330 University Drive NW, Calgary AB, T2N 4N1

19 **Summary**

20

21 The zebrafish model of *RASA1* capillary malformation and arteriovenous malformation (CM-  
22 AVM1) develops cavernous vascular malformations driven by ectopic MEK/ERK signaling in the  
23 vein, disrupting flow and downstream mechanosensitive signaling.

24 **Abstract**

25

26 Vascular malformations develop when growth pathway signaling goes awry in the endothelial  
27 cells lining blood vessels. Arteriovenous malformations (AVMs) arise where arteries and veins  
28 abnormally connect in patients with loss of RASA1, a Ras GTPase activating protein, and, as we  
29 show here, in zebrafish *rasa1* mutants. Mutant fish develop massively enlarged vessels at the  
30 connection between artery and vein in the tail vascular plexus. These AVMs progressively  
31 enlarge and become filled with slow-flowing blood and have a greater drop in pulsatility from  
32 the artery to the vein. Expression of the flow responsive transcription factor *klf2a* is diminished  
33 in *rasa1* mutants, suggesting changes in flow velocity and pattern contribute to the progression  
34 of vessel malformations. Migration of endothelial cells is not affected in *rasa1* mutants, nor is  
35 cell death or proliferation. Early developmental artery-vein patterning is also normal in *rasa1*  
36 mutants, but we find that MEK/ERK signaling is ectopically activated in the vein as compared to  
37 high arterial activation seen in wildtype animals. MEK/ERK signaling inhibition prevents AVM  
38 development of *rasa1* mutants, demonstrating venous MEK/ERK drives the initiation of *rasa1*  
39 AVMs. Thus, *rasa1* mutants show overactivation of MEK/ERK signaling causes AVM formation,  
40 altered blood flow and downstream flow responsive signaling.

## 41 Introduction

42

43 The vascular tree relies on an orderly branched structure of progressively sized vessels  
44 to effectively transport nutrients and oxygen to cells. Vascular malformations such as  
45 arteriovenous malformations (AVMs), angiomas, hemangiomas, aneurysms, and vascular  
46 tumors are a result of altered developmental vascular signaling that disrupt the tree-like  
47 structure of the vascular system. Capillary malformation-arteriovenous malformation (OMIM:  
48 608354; CM-AVM1) is caused by mutations in the RASA1 GTPase Activating Protein (Eerola et  
49 al., 2003). RASA1 is clearly important for vascular development across species as loss of *Rasa1*  
50 in mice and *rasa1* knockdown in zebrafish leads to disordered vasculature (Henkemeyer et al.,  
51 1995; Kawasaki et al., 2014; Lubeck et al., 2014).

52

53 The most prominent presentation of human CM-AVM are capillary malformations  
54 (CMs), which appear in ~95% of patients (Duran et al., 2018; Heuchan et al., 2013; Lapinski et  
55 al., 2018; Revencu et al., 2008). CMs are cutaneous beds of permanently dilated capillaries that  
56 appear as a purple-red or port-wine 'stain' on the skin. About a third of patients have an AVM  
57 that directly shunts blood between arterial and venous systems, by-passing capillary beds that  
58 normally intercede the two systems. AVMs are fragile, prone to rupture and difficult to treat.  
59 The localized nature of these vascular malformations appears to be the result of a somatic  
60 second hit that is permissive of lesion formation (Lapinski et al., 2018). Although it is a  
61 ubiquitously expressed gene, RASA1 function is necessary in endothelial cells for vascular  
62 homeostasis, and the GAP domain is critical for its function (Henkemeyer et al., 1995; Lapinski  
63 et al., 2012; Lubeck et al., 2014). Taken together, RASA1's GAP function within the endothelium  
64 is critical for vascular tree development and loss of its activity drives the development of  
65 vascular defects leading to CM-AVM.

66

67 The signaling pathway upstream of RASA1 has become clearer through genetic analysis.  
68 In zebrafish, *rasa1a* morpholino knockdown has similar vascular defects to knockdown of the  
69 EphB4 kinase (*ephb4a* morphants) including vessel enlargement in the caudal venous plexus  
70 (CVP), lack of caudal blood flow and overabundance of intersegmental veins (ISVs) at the  
71 expense of intersegmental arteries (ISAs) (Kawasaki et al., 2014). Similarly, loss of EPHB4 in  
72 mice leads to vascular malformations and, in humans, a strikingly similar disease CM-AVM2  
73 caused by mutations in human EPHB4 (OMIM: 618196) suggesting that interactions between  
74 the EPHB4 kinase and RASA1 downstream lead to similar endothelial disruption (Amyere et al.,  
75 2017; Gerety and Anderson, 2002; Gerety et al., 1999). RASA1 binds EPHB4 in vitro in cultured  
76 cells (Kawasaki et al., 2014) and given the importance of EPHB4 in determining vein identity in  
77 mice (Amyere et al., 2017; Gerety and Anderson, 2002; Gerety et al., 1999), it is reasonable to  
78 hypothesize that arteriovenous identity could be affected with loss of RASA1 and lead to  
79 arteriovenous malformation.

80 Downstream of RASA1, Ras signaling can activate two downstream pathways, either  
81 MEK/ERK or PI3K/AKT/mTORC, both of which are key in arteriovenous specification; each has  
82 evidence of being overactivated in different forms of AVM (Alsina-Sanchis et al., 2018; Chen et  
83 al., 2012; Chen et al., 2019; Fischer et al., 2004; Fish and Wythe, 2015; Fish et al., 2020; Hong et  
84 al., 2006; Iriarte et al., 2019; Kawasaki et al., 2014; Lawson et al., 2001; Lawson et al., 2002;

85 Lubeck et al., 2014; Nikolaev et al., 2018; Ola et al., 2016; Shutter et al., 2000; Wythe et al.,  
86 2013; You et al., 2005). RASA1 mutant mice hemorrhage and edema are reversed by inhibition  
87 of MEK1/2 (Chen et al., 2019), while zebrafish *rasa1a* morphant fish show fewer venous  
88 intersegmental vessels after inhibition of PI3K/mTORC (Kawasaki et al., 2014). However, it  
89 remains unclear which pathways downstream of RASA1 drive AVM formation since previous  
90 RASA1 loss of function models have not characterized AVMs.

91  
92 Here, we use a zebrafish model of Rasa1 CM-AVM to understand the real-time  
93 development of vascular malformations, and their effect on blood flow and signaling. *rasa1*  
94 genetic mutants develop AVMs in the CVP as early as 30 hours post fertilization (hpf). The  
95 AVMs progressively enlarge, disrupting blood flow and filling with stagnant blood. Loss of Rasa1  
96 is lethal by 10dpf. We observe that both blood flow velocity and pulsatility are affected by the  
97 cavernous malformation, resulting in slower flow in the AVM and a substantial drop in  
98 pulsatility from the dorsal aorta to the caudal vein. Correspondingly, expression of the flow  
99 responsive transcription factor *klf2a* is diminished, suggesting the presence of the AVM results  
100 in changes in flow velocity and pattern, potentially contributing to the progression of vessel  
101 malformations through changes in mechanosensory signaling. We see preferential activation of  
102 pERK in the vein of *rasa1* mutants and rescue of blood vessel patterning with the inhibition of  
103 MEK/ERK signaling. This shows that aberrant venous MEK/ERK signaling is critical in the  
104 initiation of Rasa1 AVMs.

105  
106  
107  
108

## 109 **Results**

110  
111

### 111 ***rasa1* mutation leads to cavernous AVM development in the tail plexus**

112  
113 There are two RASA1 orthologs in zebrafish. To create a CM-AVM1 model, we used  
114 CRISPR-Cas9 to create *rasa1a*<sup>ca35</sup> and *rasa1b*<sup>ca59</sup> mutants (Figure 1- figure supplement 1). Single  
115 *rasa1a* or *rasa1b* mutants are homozygous viable and have mild phenotypes (Figure 1- figure  
116 supplement 2) including small ectopic shunts in *rasa1a* mutants, directly between the dorsal  
117 aorta (DA) and caudal venous plexus (CVP) at 30hpf that resolve by 48hpf. As a result of the  
118 subtle, resolvable vascular phenotype of single mutants, *rasa1a*<sup>-/-</sup>;*rasa1b*<sup>-/-</sup> double mutants  
119 (hereafter *rasa1*<sup>-/-</sup> or *rasa1* mutant, generated from *rasa1a*<sup>-/-</sup>;*rasa1b*<sup>+/-</sup> incrosses) were used  
120 to characterize all vascular phenotypes.

121  
122  
123  
124  
125  
126  
127  
128

The CVP of the zebrafish tail is homologous to mammalian vascular plexi where a surplus of vessels develops initially and is gradually refined into an efficient vascular network. Patterning of vessels in the plexus does not follow a strict pattern in contrast to other highly studied beds like the intersegmental vessels in zebrafish. We used confocal microscopy to characterize vessel structure at two key stages of development. 30hpf is a critical point in CVP development since the caudal vein (CV) undergoes angiogenic sprouting between 24hpf and 30hpf. By 30hpf, the CVP has expanded ventrally and blood circulation within the vessel bed is

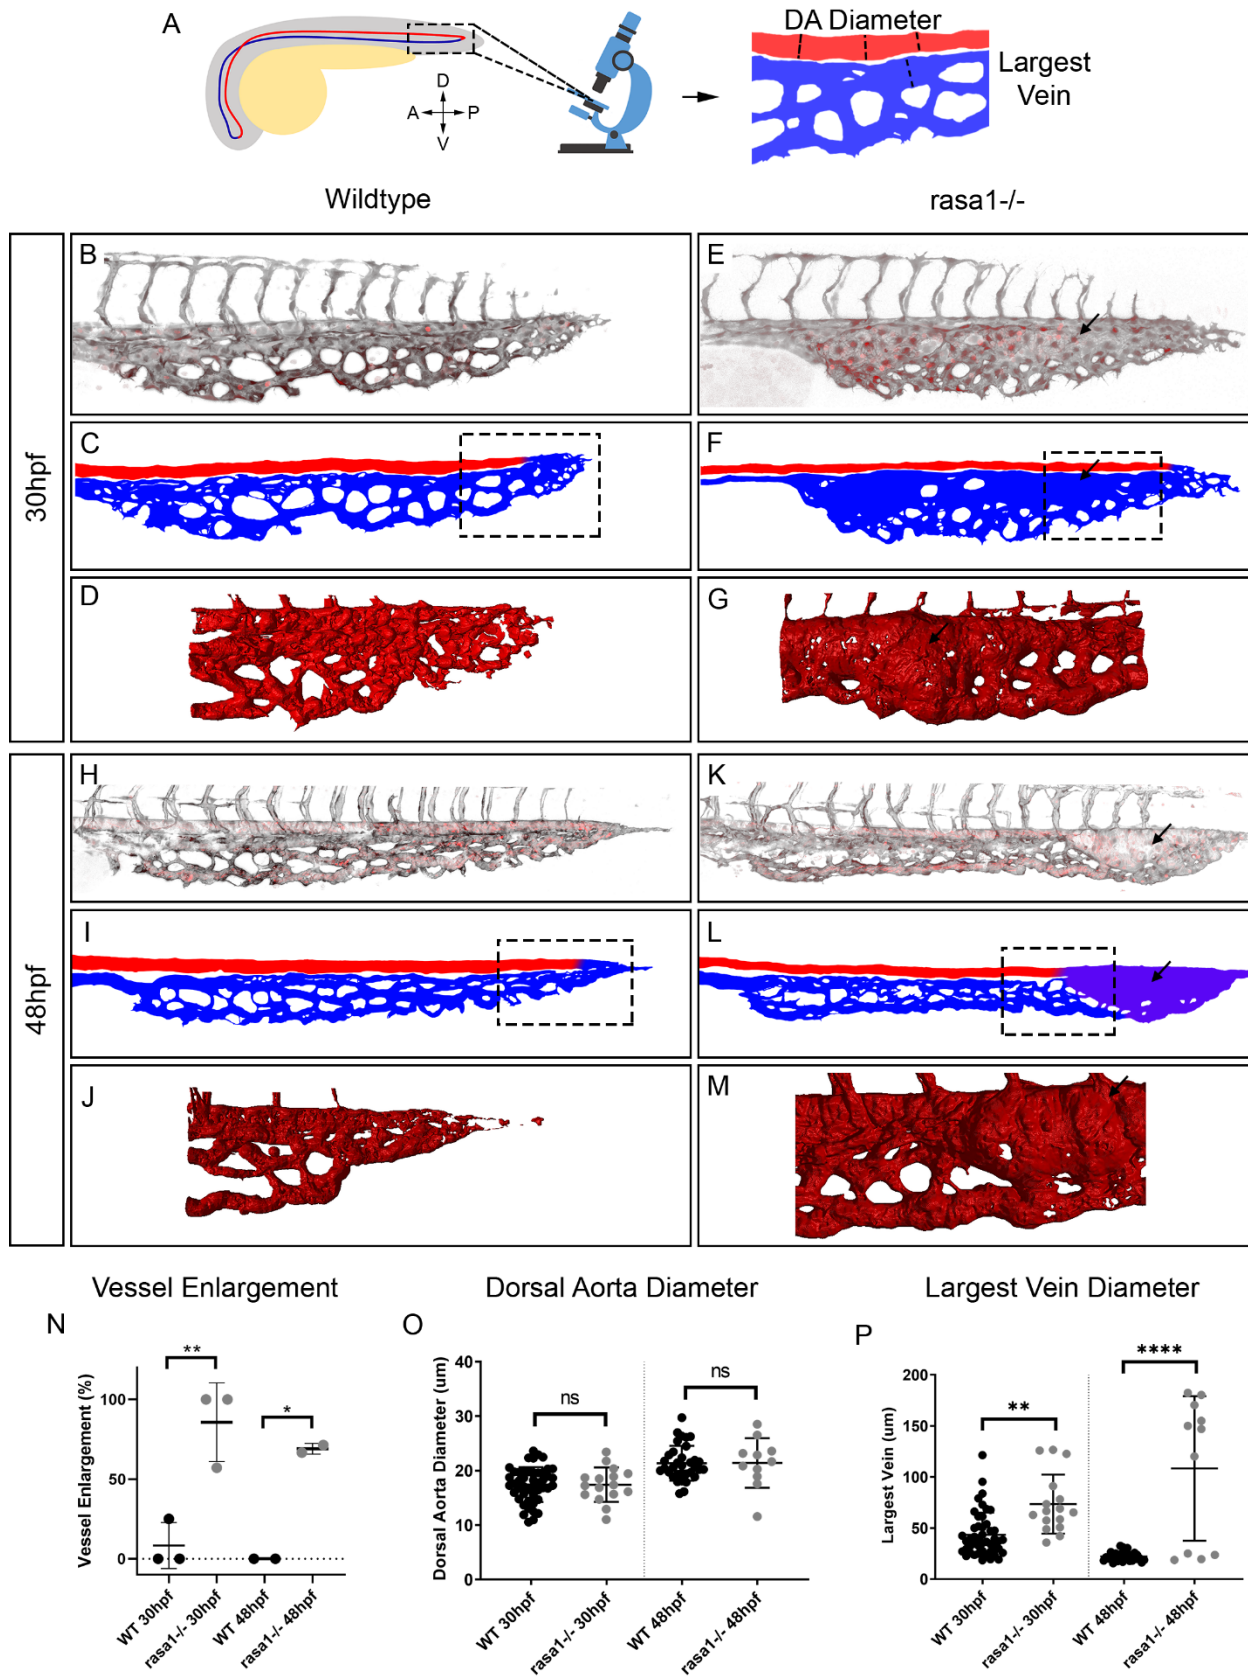

**Figure 1. Confocal imaging of *rasa1*<sup>-/-</sup> illustrates that vessel enlargement developing in the caudal venous plexus by 30hpf without affecting the dorsal aorta.**

**A:** Diagram showing the location of the caudal venous plexus, with the boxed area illustrating where confocal images were taken as well as the orientation. A=anterior, P=posterior, D=dorsal, V=ventral. **B:** Diagram showing how dorsal aorta (DA) diameter was measured in triplicate and how largest vein was measured. **B, E, H, K:** Confocal images of the caudal venous plexus of wildtype and *rasa1* mutants on *Tg(flk:EGFP;gata1a:dsRed)*. Black is the *flk:EGFP* endothelium, red is *gata1a:dsRed* red blood cells. **C, F, I, L:** Schematic of the vessel structures showing red is artery, in this case the dorsal aorta and blue is the venous structure, the caudal venous plexus and purple, marking vessels of unknown arteriovenous identity. **D, G, J, M:** Simpleware was used on high resolution confocal images to create 3D renderings of the flow return, where malformations in *rasa1* mutants develop. Note boxes in C, F, I, L only illustrate approximate location of the 3D renderings, with the 3D renderings being generated from high resolution images of different embryos. **N-O:** Quantification of confocal images of wildtype (WT) and *rasa1* mutant embryos at 30hpf and 48hpf. **N:** Penetrance of vessel enlargement ( $\geq 1.5x$  average largest wildtype vein diameter) at 30hpf and 48hpf (30hpf: WT n=13, *rasa1*<sup>-/-</sup> n=16, N=3, p=0.005. 48hpf: WT n=10, *rasa1*<sup>-/-</sup> n=10, N=2, p=0.024.) **O:** The averaged wildtype DA diameter was not significantly different than in mutants at either timepoints (30hpf: WT n=13, *rasa1*<sup>-/-</sup> n=16, N=3, p>0.99. 48hpf: WT n=12, *rasa1*<sup>-/-</sup> n=11, N=3, p>0.99). **P:** The largest vein at 30hpf is larger in mutants and is further enlarged at 48hpf (30hpf: WT: n=13, *rasa1*<sup>-/-</sup>: n=16, N=3, p=0.0018, 48hpf: WT: n=12, *rasa1*<sup>-/-</sup>: n=11, N=3, p<0.0001). P-values were calculated using a one-way ANOVA with Sidak's correction for multiple comparison. Error bars represent  $\pm$ SD.

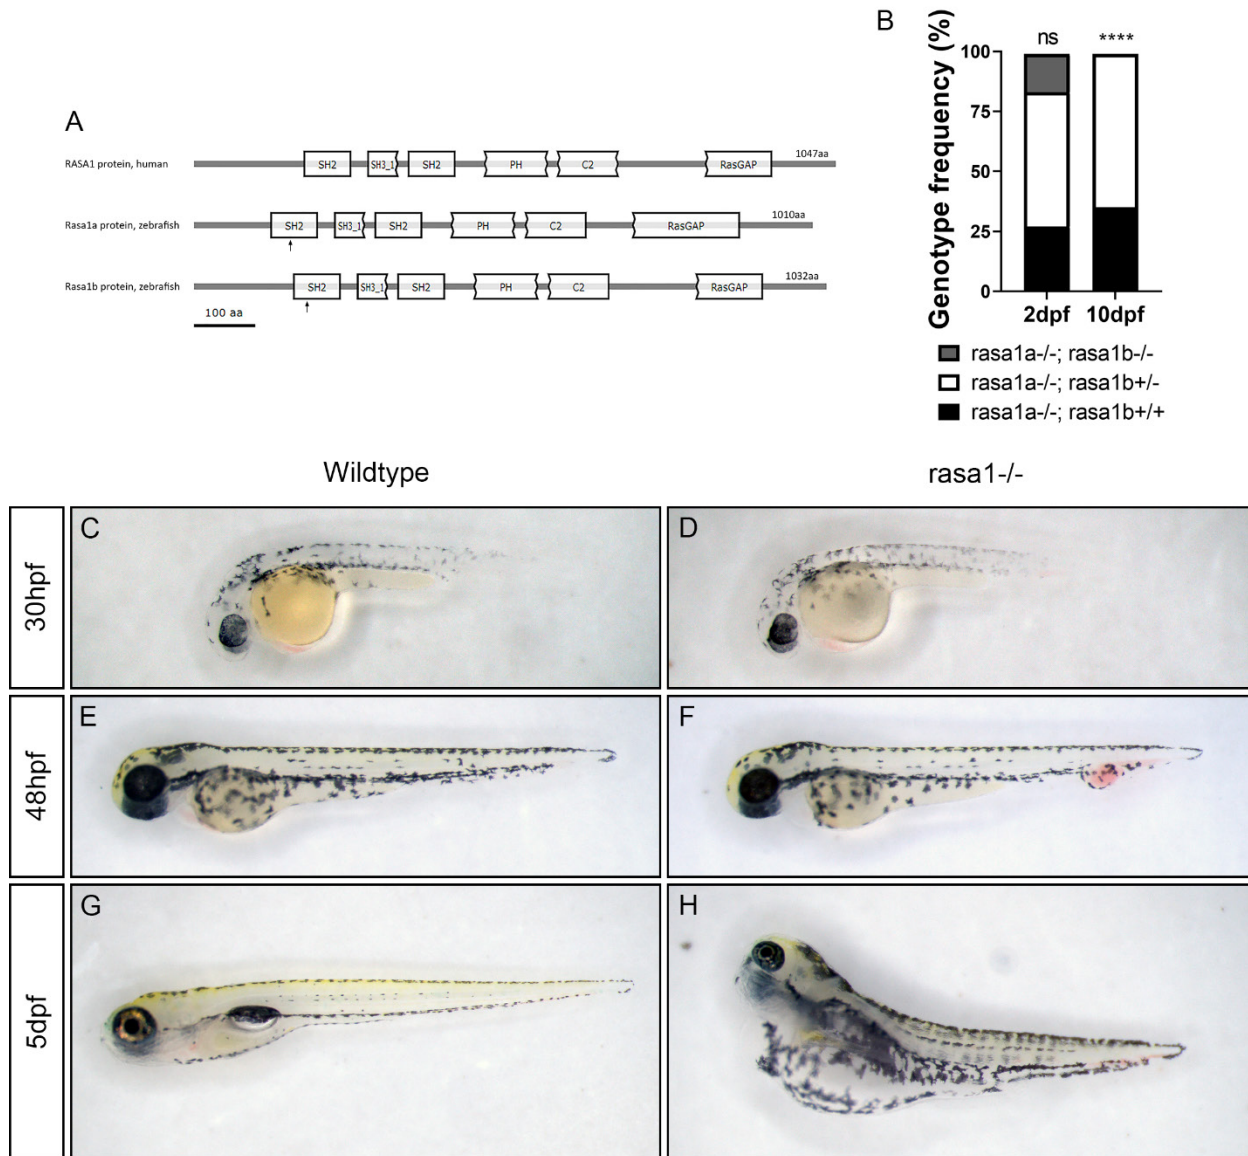

**Figure 1- figure supplement 1. *rasa1* mutants have vascular malformations in the tail vessels by 30hpf and develop severe edema by 5dpf, with *rasa1*<sup>-/-</sup> being lethal by 10dpf.**

**A:** Diagram of key protein domains in human RASA1 versus zebrafish Rasa1a and Rasa1b modified from CDvist. Arrows indicate where our *rasa1a*<sup>ca35</sup> and *rasa1b*<sup>ca59</sup> mutant lines are truncated. **B:** Genotyping of clutches at 2dpf and 10dpf reveal that complete loss of *rasa1* is lethal by 10dpf (Chi-sq:  $p < 0.0001$ ). **C-H:** Stereoscope images illustrate the relative size and severity of the vascular malformation in *rasa1*<sup>-/-</sup> at 30hpf, 2dpf and 5dpf. **C, D:** At 30hpf, *rasa1* mutants are almost indistinguishable to wildtypes under a stereoscope. **E-F:** The vascular malformation observed in the tails of mutants are obvious even under a stereoscope at 2dpf versus wildtype controls. **G-H:** By 5dpf, *rasa1*<sup>-/-</sup> develop severe edema.



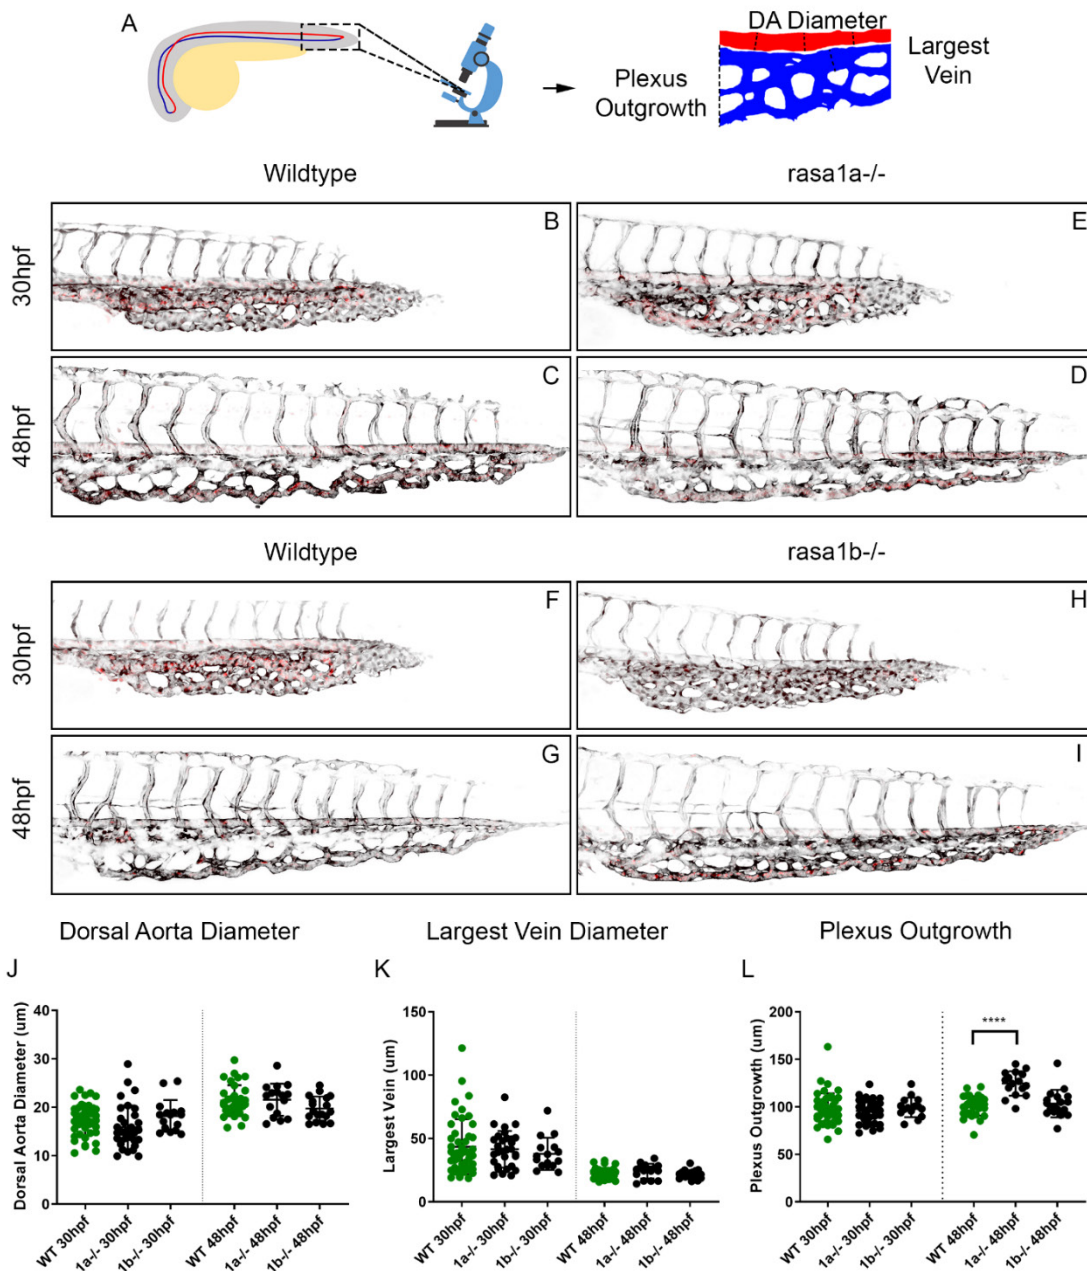

**Figure 1- figure supplement 2. *rasa1a* and *rasa1b* singles mutants have very mild vascular phenotypes.**

**A:** Schematic illustrates how confocal images were taken of wildtype and *rasa1a*<sup>-/-</sup> and *rasa1b*<sup>-/-</sup> embryos at 30hpf and 48hpf. **B-I:** Confocal microscopy of *rasa1a*<sup>-/-</sup> and *rasa1b*<sup>-/-</sup> embryos on the *Tg(flk:EGFP;gata1a:dsRed)* background at 30hpf reveal small, infrequent, ectopic connections between the dorsal aorta (DA) and caudal venous plexus which resolve by 48hpf. Black is the *flk:EGFP* endothelium, red is *gata1a:dsRed* red blood cells. 30hpf: *rasa1a*<sup>-/-</sup>: 30.3%, n=33, wildtype: 17.4%, n=23, N=6; *rasa1b*<sup>-/-</sup>: 33.3%, n=9, wildtype: 12.5%, n=8, N=2; 48hpf: *rasa1a*<sup>-/-</sup>: 0%, n=17, wildtype: 0%, n=13, N=2; *rasa1b*<sup>-/-</sup>: 0%, n=19, wildtype: 0%, n=17, N=3). **J, K, L:** Vessel measurements were quantified, no significant changes were observed in the DA diameter, largest vein diameter or plexus outgrowth at either timepoint between wildtypes and mutants except for *rasa1a*<sup>-/-</sup> had a significantly more advanced plexus at 48hpf than wildtypes (p<0.0001). P-values were calculated using a one-way ANOVA with Sidak's correction for multiple comparison. Error bars represent ±SD.

129 robust. Between 30hpf and 48hpf, pruning and remodeling of the CVP occurs; thus, defects in  
130 vessel remodeling would likely become evident by 48hpf. To detect the AVMs, we measured  
131 the diameter of the largest vein in the CVP. *rasa1* mutants show vein enlargement ( $\geq 1.5x$   
132 average largest vein in wildtype) as early as 30hpf (*rasa1*<sup>-/-</sup>: 86% $\pm$ 25 penetrance vs. WT: 8% $\pm$ 14,  
133  $p=0.0050$ , Figure 1A, E-G, N, P), averaging 73.5 $\mu\text{m}\pm$ 29.0 in diameter whereas wildtype largest  
134 veins were 43.5 $\mu\text{m}\pm$ 21.6 (LV:  $p=0.0018$ , Figure 1A-D, N, P). At 48hpf, the developing cavernous  
135 AVM is consistently located at the posterior of the tail plexus, connecting the rostral DA to the  
136 rostral CVP, subsuming a portion of the capillaries in the CVP. The largest vein in mutants at  
137 48hpf measures 108.4 $\mu\text{m}\pm$ 70.8 whereas wildtype veins narrow to 22.3 $\mu\text{m}\pm$ 4.4 (LV:  $p<0.0001$ ,  
138 Figure 1H-M, P; *rasa1*<sup>-/-</sup>: 69% $\pm$ 3 penetrance vs. WT: 0%,  $p=0.02$ ; Figure 1N). *rasa1* mutant  
139 embryos develop severe edema by 5dpf and lethality by 10dpf (Chi-sq:  $p<0.0001$ , Figure 1-  
140 Figure Supplement 1). As a control, we measured the average DA diameter upstream of the  
141 malformation. The DA does not differ in size between wildtype and mutants at either timepoint  
142 (Figure 1A-M, O). At 30hpf, wildtype DA diameter is 17.5 $\mu\text{m}\pm$ 3.2 versus *rasa1*<sup>-/-</sup> at 17.4 $\mu\text{m}\pm$ 3.2  
143 ( $p>0.99$ ) and, by 48hpf, the DA widens to 21.4 $\mu\text{m}\pm$ 3.2 in wildtypes and 21.4 $\mu\text{m}\pm$ 4.5 in mutants  
144 ( $p>0.99$ ). To demonstrate the significant vessel enlargement in mutants, we used Simpleware  
145 for 3D rendering of the vessel morphologies in wildtypes and *rasa1* mutants (Figure 1D, G, J, M-  
146 N).

147

#### 148 **Vascular malformation alters blood flow up- and down-stream of the lesion**

149

150 We next determined how the abnormal vascular architecture leads to altered blood  
151 flow patterns as this has not been examined in vivo in a *RASA1* model. We determined that  
152 heart rate is not changed at either 30hpf or 48hpf, suggesting the heart output is normal  
153 (30hpf:  $p=0.17$ , 48hpf:  $p=0.13$ , Figure 2- figure supplement 1). Using high speed video imaging,  
154 we imaged blood flow through the DA and CVP at 30hpf and 48hpf (videos 1-4). Mean velocities  
155 were calculated in the DA at the CV proximal to the flow return (Figure 2A, Figure 2- figure  
156 supplement 1). Heatmaps of representative single embryos (Figure 2B-E) and averaged from  
157 multiple embryos (Figure 2F-I) illustrate consistent flow changes in *rasa1* mutant  
158 malformations. We focused on three areas of the vasculature: 1) the DA, which is not expected  
159 to differ between mutants and wildtypes as it is upstream of the malformation, 2) the caudal  
160 vein, 3) and the point where the DA 'turns' 180 degrees into the CVP, which we named the flow  
161 return, also the site where the malformation develops in mutants.

162

163 Blood flow rates vary according to the size and location of the vessel and developmental  
164 stage. In 30 hpf zebrafish there is typically high velocity flow in the DA (573.1 $\mu\text{m}/\text{s}\pm$ 132.7),  
165 slower flow in the return (483.9 $\mu\text{m}/\text{s}\pm$ 108.7), and fast flow in the CV (593.2 $\mu\text{m}/\text{s}\pm$ 130.6, Figure  
166 2B, F, N, Figure 2- figure supplement 1). Thus, in wildtypes the flow velocity in the DA is similar to the CV  
167 ( $p=0.62$ ) at this early stage. In *rasa1* mutants at 30hpf, the average velocity in the DA is  
168 591.1 $\mu\text{m}/\text{s}\pm$ 56.9, but the CV has a significantly faster velocity than the DA at 731.7 $\mu\text{m}\pm$ 93.8  
169 ( $p=0.0062$ , paired t-test, Figure 2D, H, N, Supp. 4C). Mutants have a lower average flow speed  
170 at the flow return relative to the DA and CV (522.3 $\mu\text{m}/\text{s}\pm$ 152.6) but did not significantly differ  
171 from wildtype ( $p=0.90$ , multiple t-tests with Holm-Sidak correction). Thus, while average flow

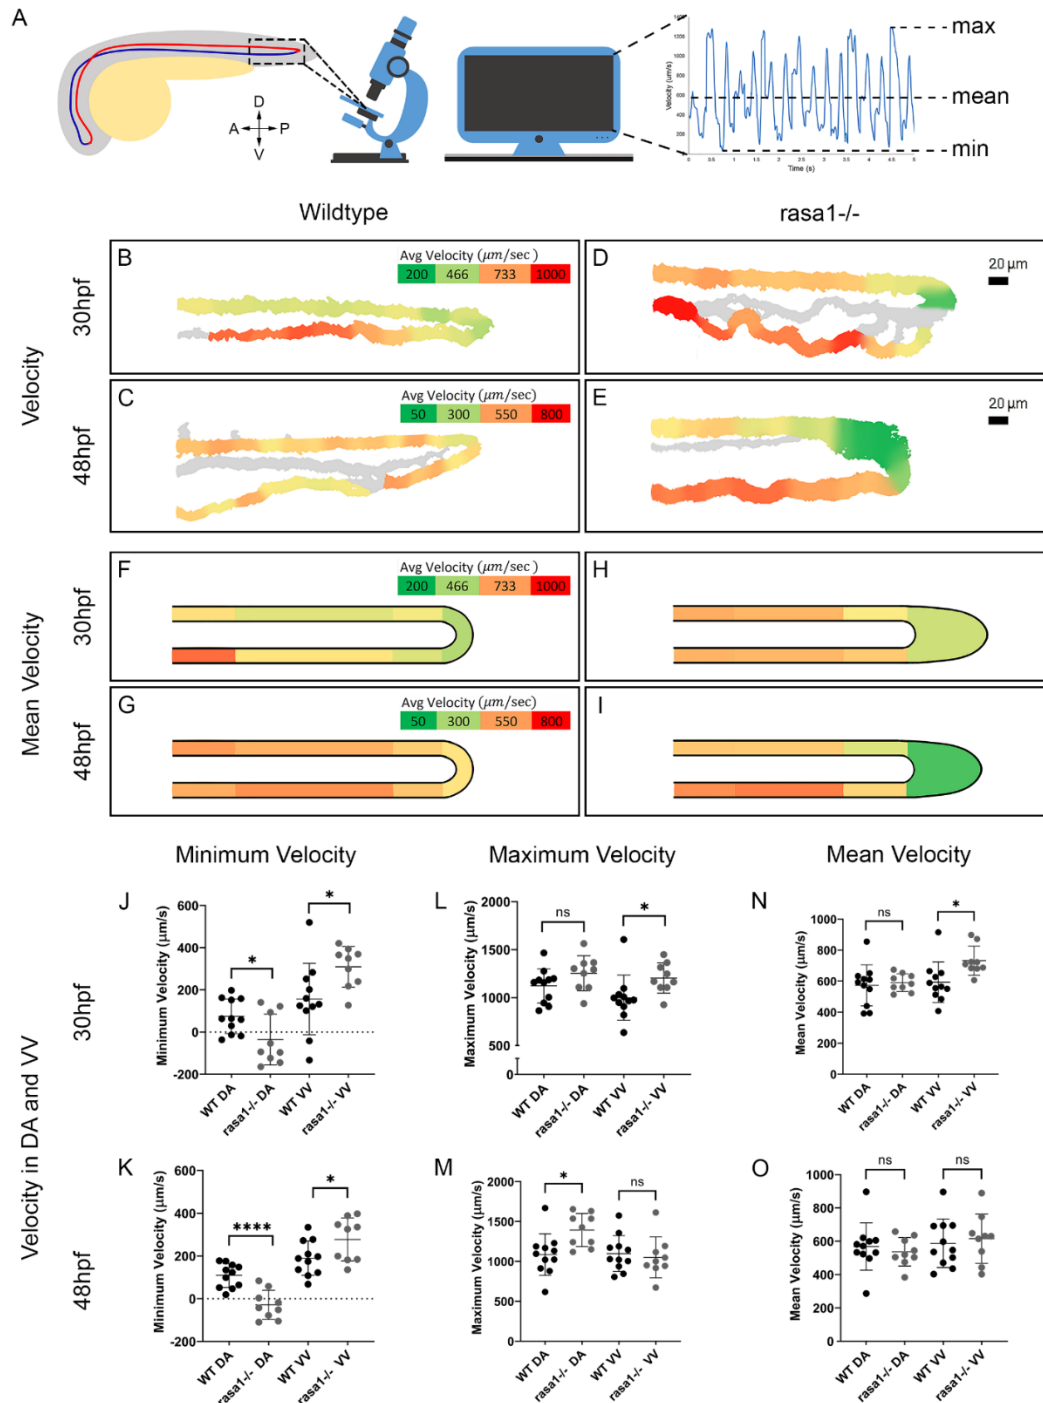

**Figure 2. Blood flow velocity is impacted by the vascular malformations in *rasa1*<sup>-/-</sup> embryos.**

**A:** Diagram illustrating where videos were taken and how velocity metrics were calculated. **B-E:** Velocity heatmaps of representative wildtype and *rasa1* mutant embryos. **F-I:** Mean velocity heatmaps wildtype (WT) and *rasa1* mutant embryos. **J-O:** Quantification of minimum, maximum and mean velocities in wildtypes and *rasa1* mutants at 30hpf and 48hpf (WT: 30hpf and 48hpf: n=11. *rasa1*<sup>-/-</sup>: 30hpf and 48hpf: n=9). **J,K:** Minimum velocity at 30hpf and 48hpf of wildtype and *rasa1* mutants in the DA and ventral vein (VV). **L,M:** Maximum velocity at 30hpf and 48hpf of WT and *rasa1* mutants in the DA and VV. **N,O:** Mean velocity at 30hpf and 48hpf of WT and *rasa1* mutants in the DA and VV. P-values were calculated using a one-way ANOVA with Sidak's correction for multiple comparison. Error bars represent  $\pm$ SD.

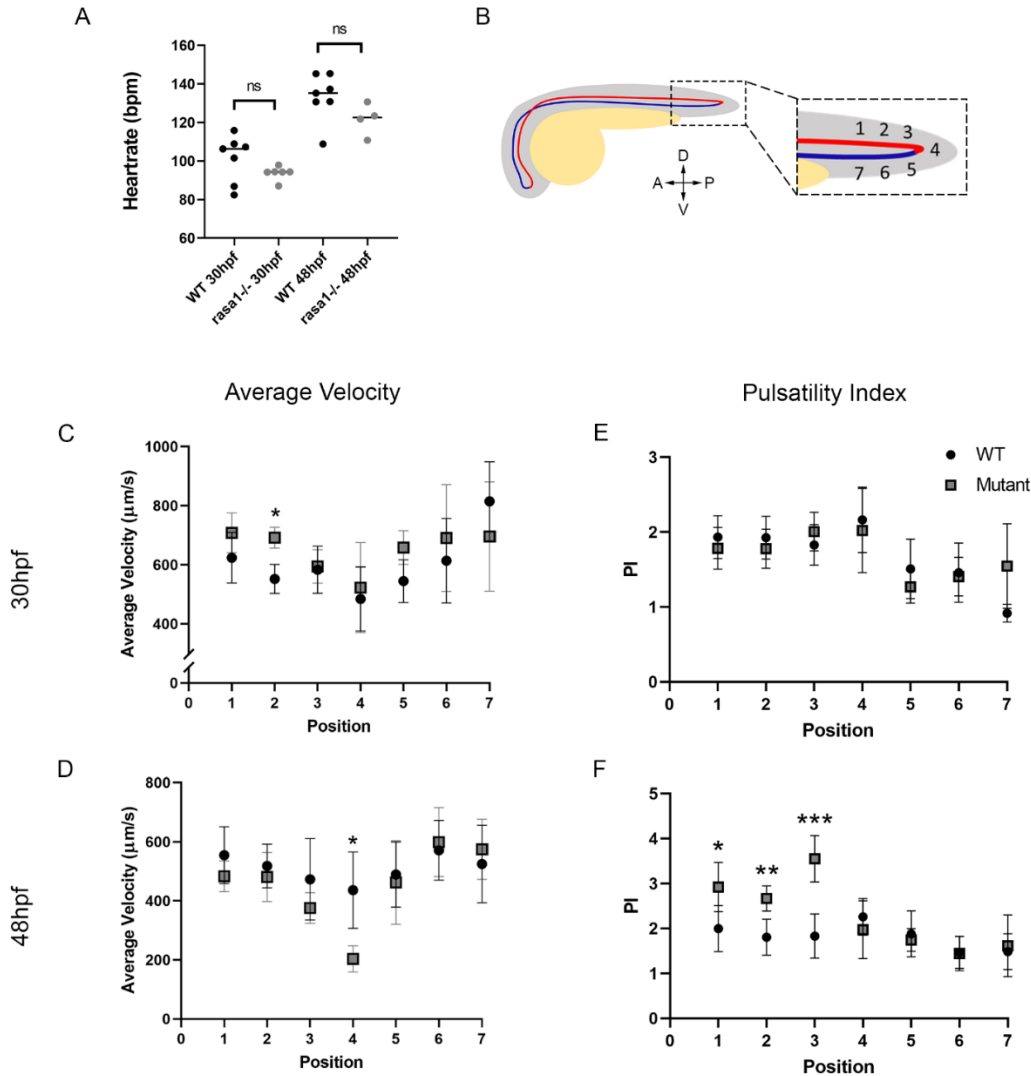

**Figure 2- figure supplement 1. Heart rate is not affected in *rasa1* mutants; average velocity and pulsatility index with positional resolution shows effects of vascular malformations throughout the DA and CVP.**

**A:** Heart rate is not impaired in *rasa1* mutants versus wildtypes at either 30hpf or 48hpf (HR: 30hpf: WT: 101.3bpm $\pm$ 12.2, n=7, *rasa1*<sup>-/-</sup>: 93.7 $\pm$ 3.6, n=6, p=0.17, N=1. 48hpf: WT: 133.4 $\pm$ 12.4, n=7, *rasa1*<sup>-/-</sup>: 121.7 $\pm$ 8.2, n=4, p=0.13, N=1, unpaired t-tests). **B:** Diagram showing the relative location of positional data, with position 1-3 on the dorsal aorta, position 4 at the flow return and position 5-7 running along the ventral vein. **C-D.** Positional data for average velocities. **C:** Average velocities at 30hpf reveal significant differences between WT and *rasa1*<sup>-/-</sup> at position 2 (WT: 551.8 $\pm$ 49.5 $\mu\text{m/s}$ , *rasa1*<sup>-/-</sup>: 691.5 $\mu\text{m/s}$  $\pm$ 35.3, p=0.00062). **D:** At 48hpf, average velocities differ at position 4 (WT: 436.3 $\mu\text{m/s}$  $\pm$ 129.4, *rasa1*<sup>-/-</sup>: 203.3 $\mu\text{m/s}$  $\pm$ 44.8, p<sub>4</sub>=0.038). **E-F:** Positional data for PI. **E:** No significant differences are seen in PI at 30hpf. **F:** At 48hpf, pulsatility is significantly different between WT and *rasa1*<sup>-/-</sup> at position 1 (WT: 2.0 $\pm$ 0.51, *rasa1*<sup>-/-</sup>: 2.9 $\pm$ 0.54, p<sub>1</sub>=0.040), position 2 (WT: 1.8 $\pm$ 0.40, *rasa1*<sup>-/-</sup>: 2.7 $\pm$ 0.28, p<sub>2</sub>=0.0031), position 3 (WT: 1.8 $\pm$ 0.49, *rasa1*<sup>-/-</sup>: 3.6 $\pm$ 0.52, p<sub>3</sub>=0.00014). P-values were calculated for positional data by multiple t-tests with Holm-Sidak correction for multiple comparisons. Error bars represent  $\pm$ SD.

172 velocity in the DA and return is similar between wildtypes and mutants, there is faster flow in  
173 the CV of mutants (DA:  $p>0.99$ , CV:  $p=0.034$ , one-way ANOVA).

174  
175 At 48hpf, wildtype DA and CV have similar average velocities (DA:  $568.2\mu\text{m/s}\pm 142.2$ , CV:  
176  $588.2\mu\text{m/s}\pm 145.5$ ,  $p=0.73$ ) and lower velocity in the flow return ( $436.3\mu\text{m/s}\pm 129.4$ , Figure 2C,  
177 G, O, Fig 2- figure supplement 1). In *rasa1* mutants at 48hpf, the malformation has enlarged and is now  
178 an AVM. However, there are no significant difference between DA or CV velocities ( $p=0.085$ ).  
179 The average flow in the DA is  $536.8\mu\text{m/s}\pm 85.8$  and in the CV is  $616.4\mu\text{m/s}\pm 147.8$  with a drop in  
180 flow speed at the return ( $203.3\mu\text{m/s}\pm 44.8$ , Figure 2E, I, O, Figure 2- figure supplement 1). There  
181 is, however, a significant drop in velocity at the flow return in mutants versus wildtypes (WT:  
182  $436.3\mu\text{m/s}\pm 129.4$ , vs. *rasa1*<sup>-/-</sup>:  $203.3\mu\text{m/s}\pm 44.8$ ,  $p_4=0.038$ ) likely because of a larger  
183 malformation. There are no significant changes in DA or CV velocities between wildtypes and  
184 mutants (DA:  $p=0.98$ , CV:  $p=0.98$ ).

185  
186 Due to the pulsatile nature of blood flow, average velocities do not capture the  
187 complexity of flow changes that occurs through the cardiac cycle. At 30hpf and 48hpf, during  
188 diastole the minimum velocities in wildtypes are not significantly different the DA (30hpf:  
189  $74.4\mu\text{m/s}\pm 82.0$ , 48hpf:  $109.1\mu\text{m/s}\pm 55.9$ ) or CV (30hpf:  $156.3\mu\text{m/s}\pm 169.8$ ,  $p=0.42$ , 48hpf:  
190  $189.7\mu\text{m/s}\pm 80.6$ ,  $p=0.075$ , Figure 2J-K). In contrast, at 30hpf in *rasa1* mutants, there is a drastic  
191 difference in minimum velocities between the two vessels with the DA minimum velocity at -  
192  $35.9\mu\text{m/s}\pm 120.5$  versus the CV at  $309.0\mu\text{m/s}\pm 96.3$  ( $p<0.0001$ , Figure 2J). A negative number  
193 indicates backflow in the DA. At 48hpf, the same trend is observed, with the minimum velocity  
194 in the DA ( $-28.6\mu\text{m/s}\pm 67.9$ ) being significantly lower than the CV ( $277.2\mu\text{m/s}\pm 100.7$ ,  $p<0.0001$ ,  
195 Figure 2K). In comparing *rasa1* mutants to wildtypes, the minimum DA velocity is significantly  
196 lower in mutants than wildtypes at both 30hpf and 48hpf (30hpf:  $p=0.026$ ; 48hpf:  $p<0.0001$ )  
197 but is higher in the mutant ventral vein at both timepoints (30hpf:  $p=0.028$ , 48hpf:  $p=0.045$ ,  
198 Figure 2J-K).

199  
200 We also examined maximum velocities during systole. In wildtypes, we find no  
201 significant difference in velocities at 30hpf or 48hpf (30hpf:  $p=0.46$ , 48hpf:  $p>0.99$ , Figure 2L-  
202 M). At 30hpf, *rasa1* mutants maximum velocities were not different between the two vessels  
203 ( $p=0.97$ , Figure 2L). When we compare *rasa1* mutants to wildtypes at 30hpf, the maximum  
204 velocity is not significantly different in the DA or CV (DA:  $p=0.45$ , CV:  $p=0.089$ ). By 48hpf, *rasa1*  
205 mutants have an increase in DA maximum velocity ( $1394\mu\text{m/s}\pm 207.9$ ) over the CV  
206 ( $1052\mu\text{m/s}\pm 256.5$ ,  $p=0.017$ , Figure 2M). Comparing wildtypes to mutants shows the maximum  
207 velocity in the DA of *rasa1* mutants ( $1394\mu\text{m/s}\pm 207.9$ ) is significantly higher than wildtypes  
208 ( $1086\mu\text{m/s}\pm 260.9$ ,  $p=0.027$ ) with no significant difference in the CV ( $p=0.99$ ).

209  
210 Taken together, the vessel malformation and AVM affect velocity extremes. Over both  
211 timepoints, an increase in minimum velocity in the CV of mutants is paired with a decrease in  
212 the minimum velocity in DA. This suggests the malformation creates flow velocity patterns that  
213 are very different to what normal vessels would experience where an increase in flow in one  
214 vessel type corresponds to a decrease in flow in the other vessel type.

215

216 **Increased drop in pulsatility between the dorsal aorta and caudal vein in *rasa1* mutants**

217  
218 Pulsatility from discrete heart beats is reflected in the amplitude of change from  
219 maximal blood velocity to the minimum velocity (Figure 3A-B, Eq. 1). We created representative  
220 single embryo pulsatility heatmaps (Figure 3C-F), and averaged pulsatility heatmaps from 7  
221 embryos (Figure 3G-J) to demonstrate variation in flow pulsatility across the DA and CVP. In  
222 wildtypes at 30hpf, heatmaps reveal higher pulsatility in the DA ( $1.9\pm 0.3$ ) and lower pulsatility  
223 in the CVP ( $1.4\pm 0.2$ ,  $p=0.0006$ , Figure 3C, G, K) as we would expect for a vessel at a distance  
224 from the heart. By 48hpf, we see that flow pulsatility evens out across the two vessels, with the  
225 DA ( $1.7\pm 0.3$ ) not statistically different than in the ventral vein ( $1.6\pm 0.2$ ,  $p=0.68$ , Figure 3E, I, M).  
226 In contrast, 30hpf *rasa1* mutants have elevated pulsatility in the DA ( $2.2\pm 0.3$ ) relative to the  
227 ventral vein ( $1.2\pm 0.1$ ,  $p<0.0001$ , Figure 3D, H, K). By 48hpf, pulsatility in the DA remains  
228 elevated relative to the CV (DA  $2.7\pm 0.5$  and CV  $1.3\pm 0.3$ ,  $p<0.0001$ , Figure 3F, J, M). At both  
229 30hpf and 48hpf, flow in the DA of mutants is more pulsatile than in wildtypes (30hpf:  $p=0.023$ ,  
230 48hpf:  $p<0.0001$ ) with no change in CV pulsatility (30hpf:  $p=0.23$ , 48hpf:  $p=0.19$ , Figure 3C-J, K,  
231 M).

232 We next mapped flow pulsatility positionally over three locations in the DA (positions 1-  
233 3), in the flow return (position 4) and three locations in the CV (positions 5-7) (Figure 2- figure  
234 supplement 1). At 30hpf, there is a stereotypical pattern of flow pulsatility in wildtypes with  
235 more pulsatile flow at the 3 DA positions as well as the flow return, and then an immediate  
236 drop in pulsatility across its entire length of the CV. At 30 hpf there are no positional differences  
237 in wildtypes and mutants. At 48hpf, pulsatility is consistent across the DA, flow return and CV in  
238 wildtypes. However, in mutants there is an increase in PI at 48hpf in the 3 DA positions  
239 (positions 1-3,  $p_1=0.040$ ,  $p_2=0.0031$ ,  $p_3=0.00014$ , Suppl. Figure 3F).

240 The drop in pulsatility from the DA to the ventral vein of the CVP (Figure 3A-B, Eq. 2)  
241 results from the effect of the malformation on artery and vein flow. At 30hpf, the average drop  
242 in PI from the DA to the VV in wildtypes is  $22.7\pm 12.0$  compared to  $43.2\pm 7.2$  in *rasa1* mutants  
243 ( $p=0.0003$ ). By 48hpf, the drop in PI is reduced in wildtypes ( $8.5\pm 8.7$ ), but more drastically  
244 elevated in mutants ( $52.8\pm 4.1$ ,  $p<0.0001$ ). This indicates that as the malformation expands,  
245 pulsatility is more severely impacted.

246 Since we detected large changes in velocity and pulsatility, it follows that  
247 mechanosensation by endothelial cells and regulation of downstream flow responsive genes  
248 could be altered in *rasa1* mutants. Using in situ hybridization, we visualized expression of *klf2a*,  
249 a transcription factor that is downregulated by flow in the trunk, at 56hpf. Wildtype embryos  
250 have strong *klf2a* staining in both the artery and vein of the trunk. *rasa1* mutants have lower  
251 *klf2a* staining in the trunk, which ends more anteriorly (as indicated with arrows; Figure 3-  
252 figure supplement 1).

253 Together these data demonstrate blood flow is strongly altered in the *rasa1* AVM,  
254 affecting the upstream input and downstream output vessels surrounding the AVM. This leads  
255 to a greater pulsatility and changes to mechanosensory signaling reflected in gene expression of  
256 *klf2a*.

257  
258 **AVMs in *rasa1* mutants do not result from changes in endothelial cell number or migration**

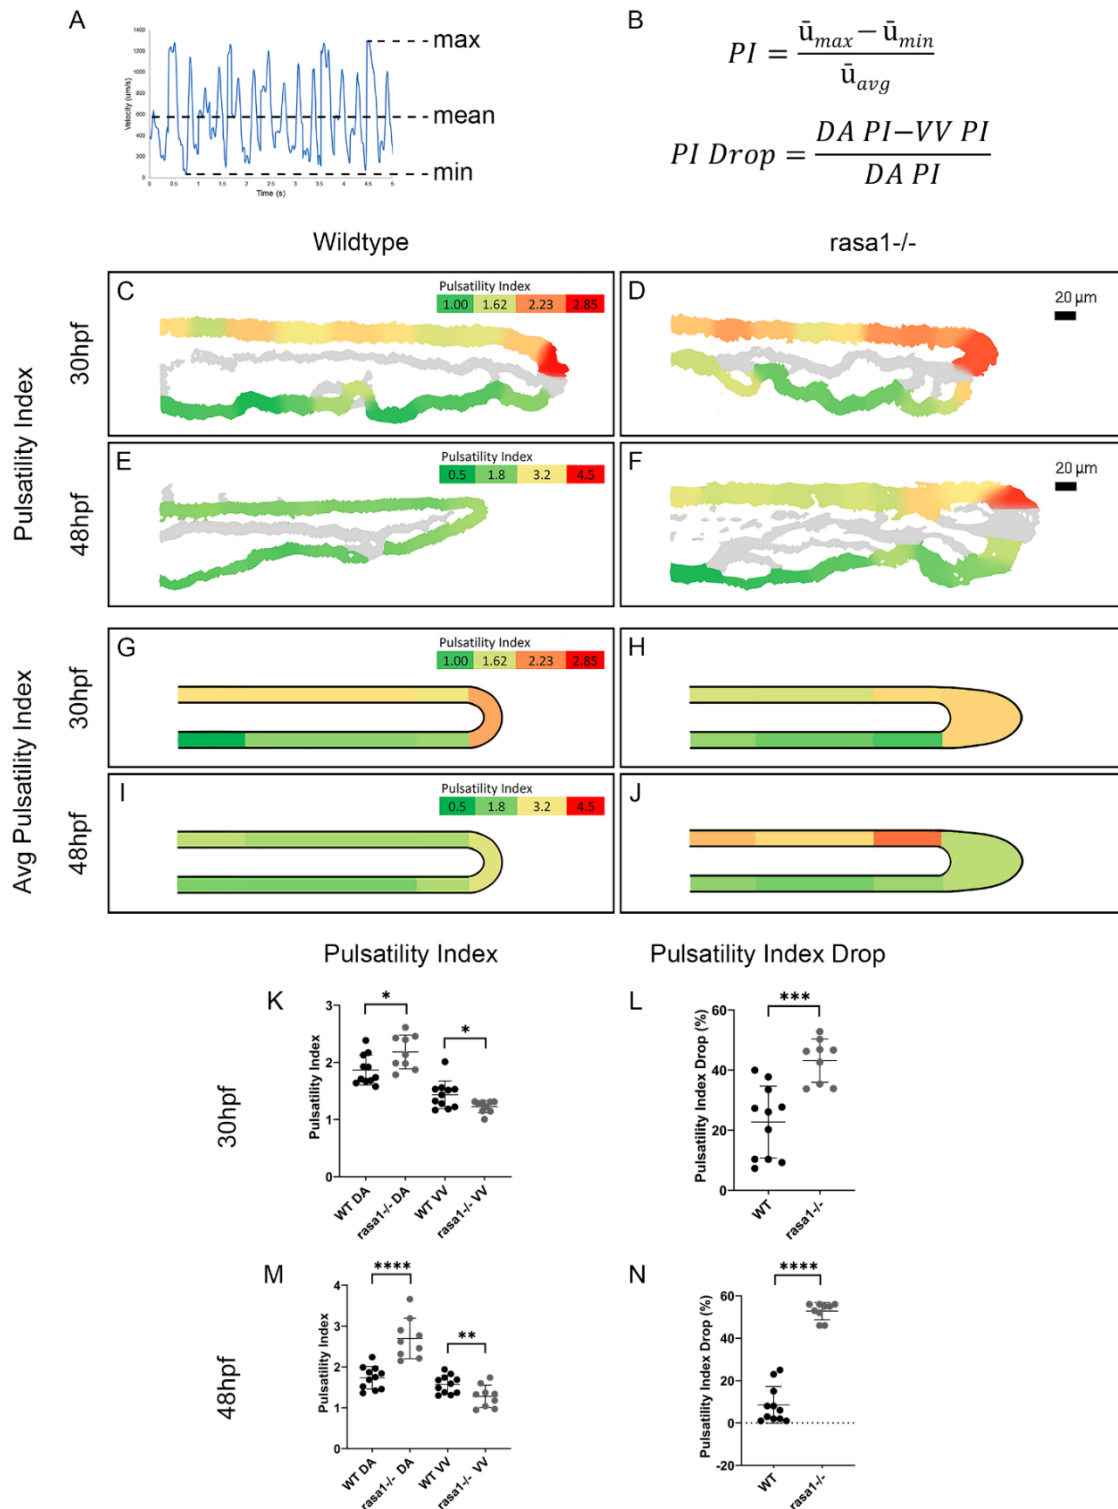

**Figure 3. Blood flow pulsatility is impacted by vascular lesions in *rasa1* mutants.**

**A, B:** Diagram and equations illustrating how pulsatility index (PI) and PI drop were calculated. **C-F:** PI heatmaps of representative wildtype and *rasa1* mutant embryos. **G-J:** Average PI heatmaps wildtype and *rasa1* mutant embryos. **K-L:** PI at 30hpf and 48hpf, respectively, of WT and *rasa1* mutants in the DA and VV. **M, N:** PI drop at 30hpf and 48hpf, respectively, of WT and *rasa1* mutants in the DA and VV. P-values were calculated using a one-way ANOVA with Sidak's correction for multiple comparison. Error bars represent  $\pm$ SD.

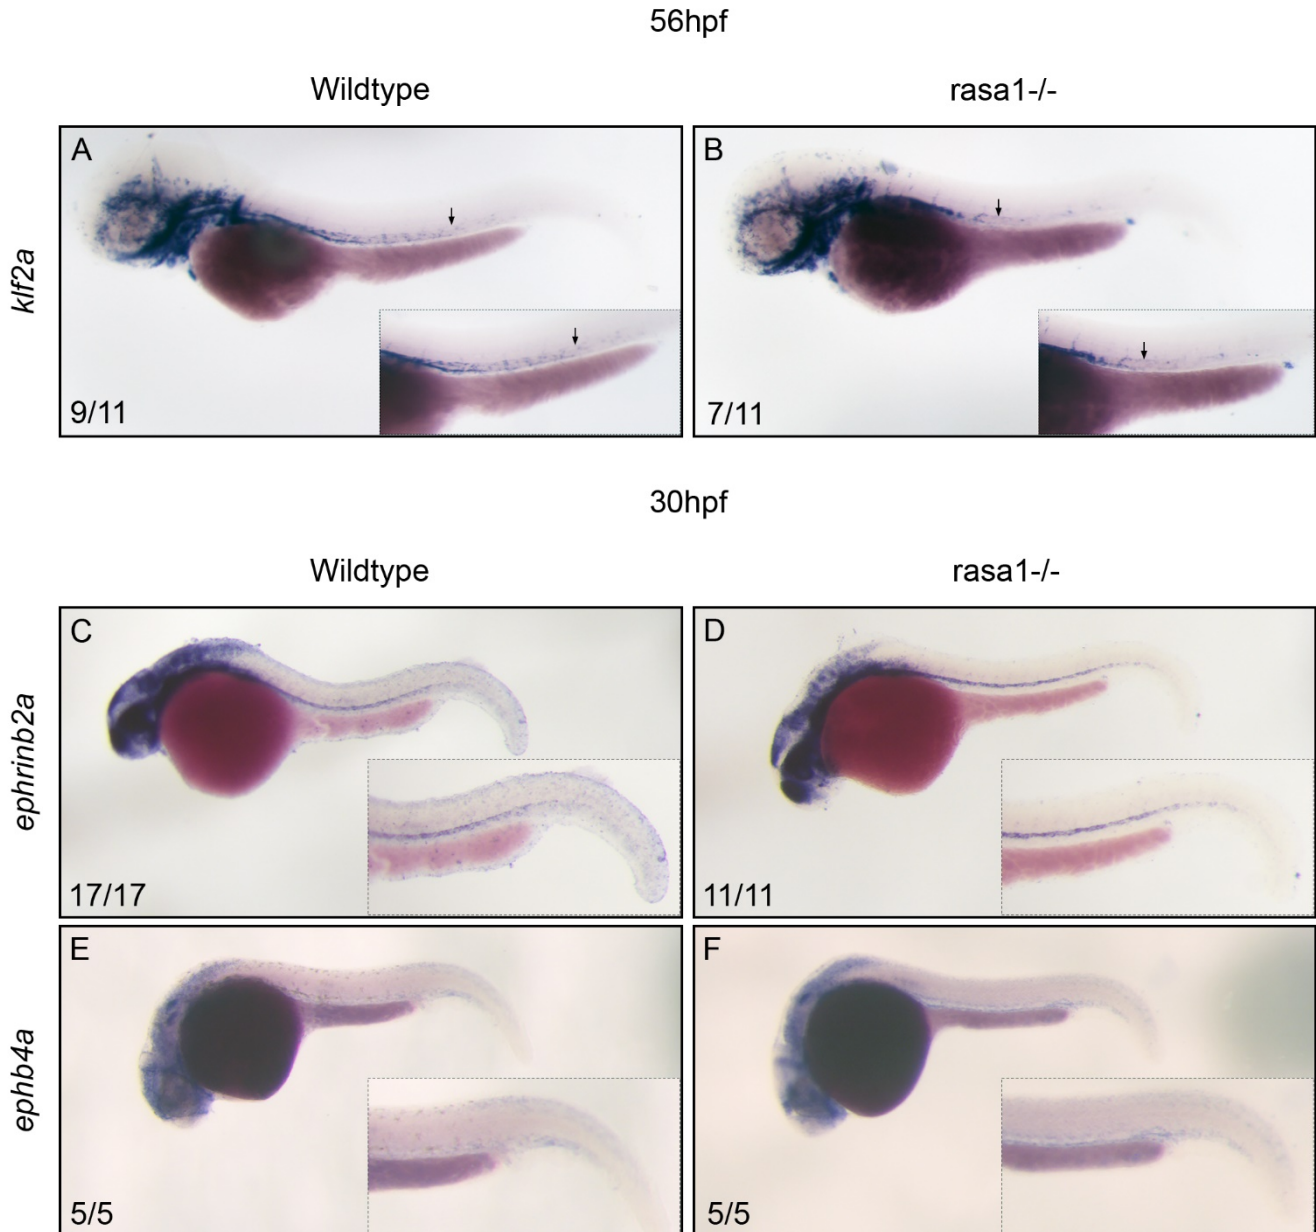

**Figure 3- figure supplement 1. *ephrinb2a* and *ephb4a* ISH reveal no changes in early arteriovenous specification but flow responsive *klf2a* staining shows decreased expression in *rasa1* mutants.** In situ hybridization in wildtype and *rasa1* mutants (A-B): *klf2a* shows a decrease in staining intensity above the yolk extension at 56hpf in mutants. Arrows indicate the posterior-most position of consistent *klf2a* staining. (C-D) Arterial *ephrinb2a* and venous *ephb4a* (E-F) in wildtypes and *rasa1*<sup>-/-</sup> show no obvious difference in staining at 30hpf.



259  
260  
261  
262  
263  
264  
265  
266  
267  
268  
269  
270  
271  
272  
273  
274  
275  
276  
277  
278  
279  
280  
281  
282  
283  
284  
285  
286  
287  
288  
289  
290  
291  
292  
293  
294  
295  
296  
297  
298  
299  
300  
301

AVMs could develop from an over-proliferation of endothelial cells or a collapse of a plexus into a singular vessel due to apoptosis. However, we find no change in total endothelial cell number between wildtypes and mutants at either timepoint (30hpf:  $p=0.99$ , 48hpf:  $p>0.99$ , Figure 4K). Proliferation, as detected by phospho-histone H3 (PHH3) staining and show no significant change at 30hpf or 48hpf in mutants versus controls (30hpf:  $p=0.98$ , 48hpf:  $p>0.99$ , Figure 4A-E). We saw no change in apoptotic cells using immunostaining for cleaved caspase 3 (30hpf:  $p>0.99$ , 48hpf:  $p>0.99$ , Figure 4F-J). Overall, this suggests that malformations in *rasa1* mutants do not arise from differences of endothelial cell number.

Differences in endothelial behavior might underlie vascular malformation development and progression. For instance, failed sprouting and migration of endothelial cells could result in the formation of vascular malformations. Thus, we quantified the migration distance of wildtype and *rasa1* CVP endothelial cells by imaging the CVP at key developmental windows and CVP migration speed through timelapse imaging. Measuring the furthest extent of the CVP from the DA at different stages, we find no difference in CVP migration distance at 30hpf (WT:  $98.0\mu\text{m}\pm 16.3$ , vs. *rasa1*<sup>-/-</sup>:  $101.7\mu\text{m}\pm 16.7$ ,  $p=0.89$ , Figure 4- figure supplement 1). However, the CVP is significantly larger at 48hpf in mutants than wildtypes (WT:  $101\mu\text{m}\pm 10$ , vs. *rasa1*<sup>-/-</sup>:  $128\mu\text{m}\pm 26$ ,  $p<0.0001$ , Figure 4- figure supplement 1) that might reflect the swelling of the AVM and not true migration. There is no change in mutant migration speed from timelapse imaging between 24–30hpf, a critical window in CVP development as the CV actively sprouts to form the CVP (WT:  $1.7\mu\text{m}/\text{hr}\pm 2.0$ , *rasa1*<sup>-/-</sup>:  $0.99\mu\text{m}/\text{hr}\pm 2.1$  ( $p=0.48$ ; Figure 4- figure supplement 1, videos 5-6).

*rasa1* is expressed ubiquitously so we tested whether AVMs could be found in another venous vascular plexus. We imaged the subintestinal venous plexus (SIVP), that develops slightly later, and expands between 58hpf and 76hpf over the surface of yolk sac (Goi and Childs, 2016). We find no obvious vessel malformations or change in SIVP migration distance at 58hpf ( $p=0.45$ , Figure 4- figure supplement 1) or at 76hpf ( $p=0.20$ ). Overall, these results indicate that there is no substantial impairment of endothelial migration in *rasa1* mutants. No AVMs were observed in the animals in other locations including the cerebral circulation. Thus, the CVP appears particularly sensitive to AVM development after loss of *rasa1*.

### Overactivation of venous MEK/ERK signaling in developing vascular malformations

Upregulation of MEK/ERK signaling is observed in vascular anomalies including mouse and human RASA1 mutant cells. pERK immunostaining, a readout of active MEK/ERK signaling, reveals fewer pERK positive nuclei in the DA of *rasa1* mutants at 30hpf ( $1.6\text{cells}\pm 1.4$ ) versus wildtypes ( $4.3\text{cells}\pm 4.3$ ,  $p=0.03$ , Figure 5A-B). In contrast, we find a significant increase in pERK nuclei in the vein with  $2.0\pm 2.6$  pERK positive cells in wildtype versus  $5.1\pm 2.9$  cells in mutants ( $p=0.0020$ ). There is no change in pERK positive nuclei in the intersegmental arteries ( $p=0.52$ ) sprouting from the DA (intersegmental veins have yet to sprout from the CVP at 30hpf).

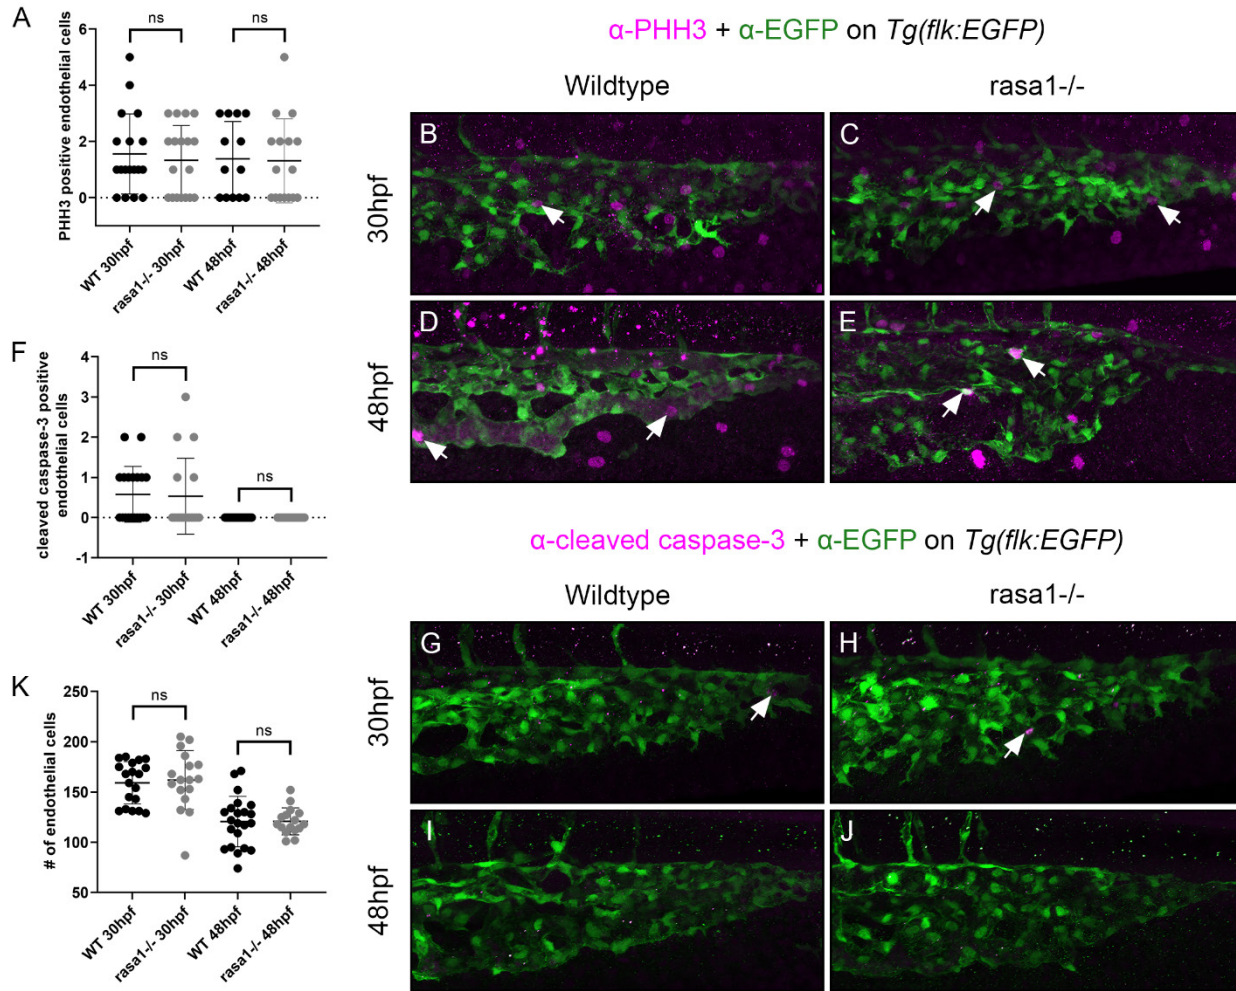

**Figure 4. Proliferation and cell death do not drive AVM formation in *rasa1*<sup>-/-</sup>.**

**A-E:** Antibody staining of proliferative cells marked by phospho-histone H3 (PHH3) and **F-J:** apoptotic cells with cleaved caspase-3 (cc3) was performed quantified as well as **K:** endothelial cell numbers in the tail vessels based on their transgenic background, *Tg(flk:EGFP)*. **A:** PHH3 staining showed no significant elevation at 30hpf or 48hpf versus controls (30hpf: WT: 1.6cells±1.4, n=18, *rasa1*<sup>-/-</sup>: 1.3cells±1.2, p=0.98, n=18, N=2. 48hpf: WT: 1.4cells±1.3, n=13, *rasa1*<sup>-/-</sup>: 1.3cells±1.5, p>0.99, n=16, N=2). **B-E.** Confocal images show PHH3 staining and arrows indicate PHH3+ endothelial cells in wildtypes and mutants at both timepoints. **F.** Apoptotic cells marked by cc3 also did not show any differences between wildtypes and mutants for either timepoint (30hpf: WT: 0.6cells±0.7, n=19, *rasa1*<sup>-/-</sup>: 0.5cells±0.9, p>0.99, n=17, N=2, 48hpf: WT: 0cells±0, n=22, *rasa1*<sup>-/-</sup>: 0cells±0, p>0.99, n=17, N=2). **G-J.** Confocal images show cc3 staining and arrows indicate cc3+ endothelial cells in wildtypes and mutants at 30hpf. No cc3 staining in the endothelium was observed at 48hpf. **K.** Endothelial cell counts reveal no significant difference in cell number between wildtypes and mutants at either timepoint (30hpf: WT: 159.2cells±21.1, n=19, *rasa1*<sup>-/-</sup>: 161.9cells±29.3, *rasa1*<sup>-/-</sup>: n=17, p=0.99, N=2, 48hpf: 48hpf: WT: 120.6cells±25.1, n=22, *rasa1*<sup>-/-</sup>: 120.8cells±13.4, *rasa1*<sup>-/-</sup>: n=17, p>0.99, N=2). P-values were calculated using a one-way ANOVA with Sidak's correction for multiple comparison. Error bars represent ±SD.

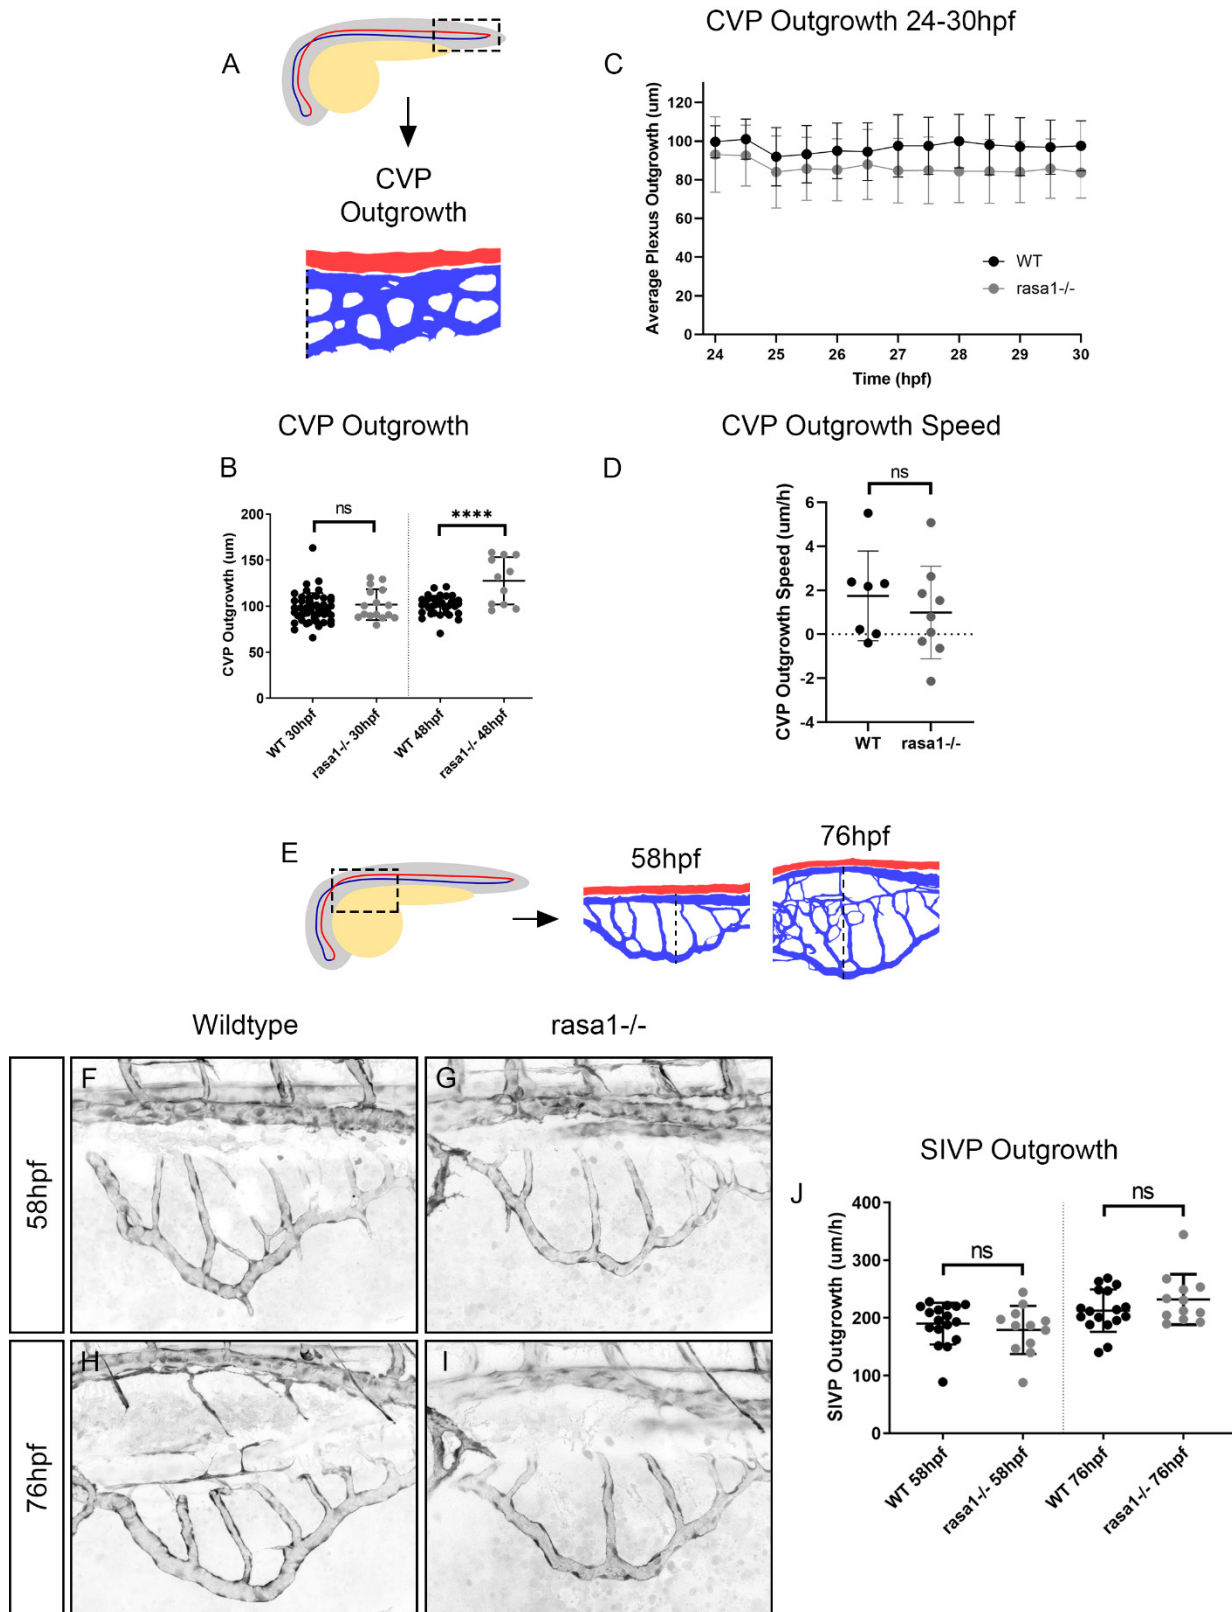

Figure 4- figure supplement 1. Endothelial migration is unchanged in *rasa1* mutants.

**A:** Diagram illustrating how CVP outgrowth was measured, perpendicularly from the DA to the ventral-most aspect of the CVP. **B:** Plexus outgrowth is unchanged between wildtypes and mutants at 30hpf ( $p=0.89$ ) but is more advanced at 48hpf in mutants than wildtypes ( $p<0.0001$ ). **C,D:** There is no change in *rasa1* mutant migration speed from 24–30hpf from  $1.7\mu\text{m/hr}\pm 2.0$  in wildtypes to  $0.99\mu\text{m/hr}\pm 2.1$  ( $p=0.89$ , WT:  $n=7$ , *rasa1*<sup>-/-</sup>:  $n=9$ ,  $N=3$ ). **E:** Diagram illustrates where subintestinal venous plexus (SIVP) images were taken and how plexus outgrowth was measured, perpendicularly from the DA to the ventral-most aspect of the SIVP. **F-I:** Confocal microscopy of wildtype (F, G) and *rasa1*<sup>-/-</sup> (H, I) on *Tg(flk:EGFP)* shown in black at 58hpf and 76hpf of the same embryos while the subintestinal venous plexus (SIVP) expands over the yolk sac. **J:** No change was seen in SIVP outgrowth at either timepoints (58hpf, WT:  $190.2\mu\text{m}\pm 36.0$  and *rasa1* mutant at  $179.1\mu\text{m}\pm 41.8$ ,  $p=0.45$ . 76hpf, WT:  $212.6\mu\text{m}\pm 36.6$  and *rasa1* mutant SIVP at  $232.0\mu\text{m}\pm 43.6$ ,  $p=0.20$ , WT:  $n=17$ , *rasa1*<sup>-/-</sup>:  $n=12$ ,  $N=3$ , paired t-test). Error bars represent  $\pm$ SD.

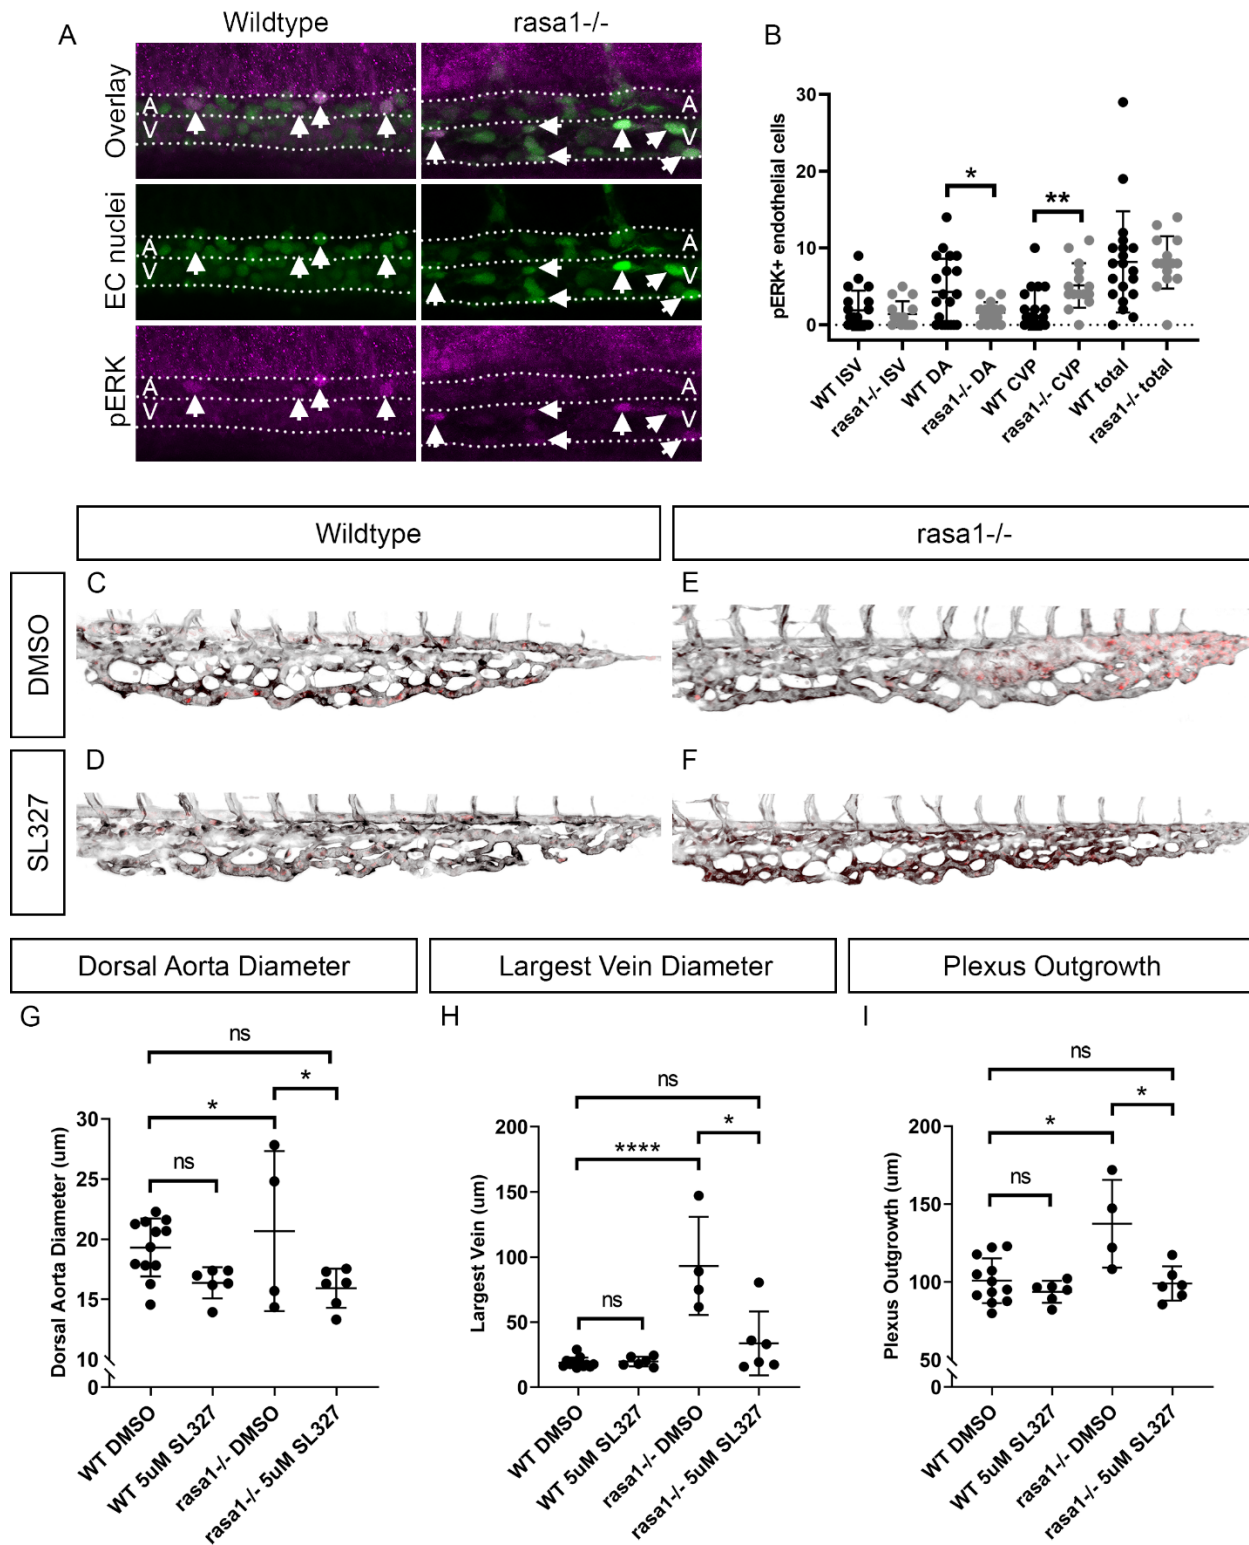

**Figure 5. Ectopic venous activation of pERK in *rasa1* mutants may drive AVM formation, with cavernous malformations in *rasa1* mutants rescued by MEK/ERK inhibition.**

**A-B:** pERK antibody staining revealed and increase in pERK in the vein (WT: 2.0cells±2.6, *rasa1*<sup>-/-</sup>: 5.1cells±2.9, p=0.0020) and a decrease in the DA (WT: 4.3cells±4.3, *rasa1*<sup>-/-</sup>: 1.6cells±1.4, p=0.03) with no change in ISVs (WT: 1.9cells±2.6, *rasa1*<sup>-/-</sup>: 1.4cells±1.7, p=0.52) (WT: n=20, *rasa1*<sup>-/-</sup>: n=15, N=3, unpaired t tests). **C-F:** Confocal images of wildtype and *rasa1* mutants on *Tg(flk:EGFP;gata1a:dsRed)* when treated with DMSO or SL327. Black is the *flk:EGFP* endothelium, red is *gata1a:dsRed* red blood cells. **G:** Quantification of dorsal aorta diameter in wildtype (WT) and *rasa1* mutants treated with DMSO and SL327 (WT<sub>DMSO</sub> vs. *rasa1*<sup>-/-</sup><sub>DMSO</sub>: p=0.90, WT<sub>DMSO</sub> vs. *rasa1*<sup>-/-</sup><sub>SL327</sub>: p>0.13, N=1, one-way ANOVA, Sidak's multiple comparisons). **H:** Rescue of largest vein diameter is seen in *rasa1* mutants treated with SL327 (WT<sub>DMSO</sub> vs. *rasa1*<sup>-/-</sup><sub>DMSO</sub>: p<0.0001, WT<sub>DMSO</sub> vs. *rasa1*<sup>-/-</sup><sub>SL327</sub>: p=0.36, N=1). **I:** Plexus outgrowth is rescued by SL327 treatment of *rasa1* mutants treated with SL327 (WT<sub>DMSO</sub> vs. *rasa1*<sup>-/-</sup><sub>DMSO</sub>: p=0.0013, WT<sub>DMSO</sub> vs. *rasa1*<sup>-/-</sup><sub>SL327</sub>: p>0.99, N=1). P-values were calculated using a one-way ANOVA with Sidak's correction for multiple comparison for SL327 experiments. Error bars represent ±SD.

302 Since MEK/ERK signaling is implicated in artery specification, we used in situ  
303 hybridization to assess if initial artery and vein specification were normal (Figure 3- figure  
304 supplement 1). Both arterial *ephrinb2a* and venous *ephb4a* expression at 30hpf appear  
305 identical in wildtype and *rasa1* mutants, suggesting early arteriovenous specification is  
306 unaffected (Figure 3- figure supplement 1).

307  
308 To test whether venous pERK activation is important in AVM formation and if we could  
309 block AVM development, we applied 5 $\mu$ M SL327 (a MEK1/MEK2 inhibitor) from 24-48hpf. The  
310 largest veins of wildtype embryos treated only with DMSO vehicle control were 18.9 $\mu$ m $\pm$ 3.9 in  
311 comparison to *rasa1* mutants that measured 93.2 $\mu$ m $\pm$ 37.7 ( $p < 0.0001$ , Figure 5C, E, H). MEK  
312 inhibition resulted in rescue of the enlarged vessels in *rasa1*<sup>-/-</sup> to a caliber indistinguishable  
313 from wildtype with DMSO (*rasa1*<sup>-/-</sup>-SL327: 33.7 $\mu$ m $\pm$ 24.4,  $p = 0.36$ , Figure 5C, F, G) and significantly  
314 smaller than DMSO-treated *rasa1* mutants (93.2 $\mu$ m $\pm$ 37.7,  $p < 0.0001$ , Figure 5E-F, H). There is no  
315 significant change in DA diameter with DMSO treatment ( $p = 0.90$ ) or SL327 treatment in  
316 wildtypes or *rasa1* mutants ( $p > 0.99$ , Figure 5C-G). We also tested whether the maximal  
317 migration distance is changed. We find that there is no significant difference in maximal  
318 distance of the plexus between vehicle treated wildtypes (100.8 $\mu$ m $\pm$ 14.4) and MEK inhibitor  
319 treated *rasa1* mutants (99.0 $\mu$ m $\pm$ 11.0,  $p > 0.99$ , Figure 5C-F, I). Taken together we show that  
320 while artery-vein identity is initially not changed, activation of venous pERK is enhanced in  
321 *rasa1* mutants. pERK activation in the vein is functionally important since inhibition of MEK/ERK  
322 activity prevents AVM formation.

323  
324

## 325 Discussion

326

### 327 Zebrafish *rasa1* mutants develop arteriovenous vascular malformations downstream of 328 artery-vein specification

329

330 In vivo models of AVM formation with a stereotypical location are rare. We report that  
331 *rasa1* mutant (*rasa1a*<sup>-/-</sup> and *rasa1b*<sup>-/-</sup>) zebrafish develop AVMs in the region of the caudal  
332 venous plexus (CVP) where the dorsal aorta (DA) turns into a venous plexus bed before  
333 returning to the heart. The vascular malformation we observe is an AVM because it develops  
334 and subsumes both vessels. In humans, vascular lesions arise from tissues where RASA1 incurs  
335 a somatic second hit (Cai et al., 2018; Lapinski et al., 2018; Macmurdo et al., 2016), while our  
336 model is a full genetic knockout. Phenotypes of single zebrafish *rasa1a* and *rasa1b* mutants are  
337 mild and a double knockout is necessary to produce highly penetrant phenotypes. *rasa1*  
338 mutant zebrafish do not survive to adulthood, and similarly, no humans have been identified  
339 with homozygous loss of function (pLI=1.0 for RASA1 in GnomAD v2.1.1). Rather, somatic  
340 mutations are found in the localized lesions of RASA1 heterozygous CM-AVM patients, making  
341 the lesions homozygous for RASA1 mutations.

342

343 In the zebrafish tail, the DA and CVP are molecularly distinct, but directly connected. We  
344 observe vascular phenotypes initiate in the vein of *rasa1* mutants. A key metric to distinguish

345 effects on the artery and vein is diameter. *rasa1* mutant AVMs have a massively increased  
346 diameter over normal CVP vessels but no change is seen in the artery. Genetic establishment of  
347 the artery or vein program occurs early in development, and key markers such as EphrinB2a  
348 and EphB4 are differentially expressed as early as 20-24hpf in development (Damm and  
349 Clements, 2017; Ren et al., 2013; Swift et al., 2014; Thisse et al., 2001). However, we show that  
350 arteries and veins appear to be correctly specified at 30hpf using the markers *ephrinb2a* and  
351 *ephb4a*. Thus, the zebrafish *rasa1* AVM likely develops after specification of artery and vein.  
352 This is not surprising given that RASA1 and EPHB4 are known to physically interact (Kawasaki et  
353 al., 2014), and that Rasa1 would act downstream of EphB4 receptor expression, but interfering  
354 with signaling and venous differentiation. EphB4 is a critical player in venous identity. Human  
355 CM-AVM2 results from mutations in EPHB4, further lending evidence to these two proteins  
356 acting in the same pathway (Amyere et al., 2017). EphB4 plays an important role in the  
357 separation of vein from artery through interaction with the arterial ligand, EphrinB2 (Hamada et  
358 al., 2003; Wang et al., 1998). Even if artery and vein are correctly specified, loss of EphB4  
359 downstream signaling through loss of Rasa1 may affect the maintenance of the venous fate,  
360 resulting in incomplete separation of artery and vein. Other genetic forms of AVM are with  
361 altered signaling downstream in the Ras pathway also change arteriovenous signaling. KRAS  
362 gain-of-function changes expression of Notch pathway genes involved in arteriovenous  
363 specification (*DLL4*, *NOTCH1*, *HES1* and *HEY2*) but without the disruption of upstream *EPHRINB2*  
364 and *EPHB4* expression (Nikolaev et al., 2018). We propose that Rasa1 is necessary for the  
365 maintenance of venous fate, and its loss leads to aberrant connections with the artery,  
366 abnormal angiogenesis of the vein and upregulated pERK signaling (Figure 6).

367

### 368 **Ectopic pERK signaling in the vein of *rasa1* mutant AVMs**

369

370 Loss of Rasa1 results in overactivation of Ras signaling and two potential downstream  
371 pathways, PI3K or MEK/ERK. Both pathways are drivers of AVMs in humans and animal models.  
372 The PI3K pathway is elevated in human and mouse models of HHT, and in human RASA1  
373 vascular lesions (Alsina-Sanchis et al., 2018; Iriarte et al., 2019; Kawasaki et al., 2014; Ola et al.,  
374 2016). MEK/ERK signaling is upregulated in KRAS-caused brain AVM and in the Rasa1 mouse  
375 model as well as human RASA1 vascular lesions (Chen et al., 2019; Fish et al., 2020; Kawasaki et  
376 al., 2014; Lubeck et al., 2014; Nikolaev et al., 2018). Both MEK/ERK and PI3K/AKT/mTORC  
377 pathways are important in the specification of either artery (MEK/ERK) (Fischer et al., 2004;  
378 Hong et al., 2006; Lawson et al., 2001; Lawson et al., 2002; Shutter et al., 2000; Wythe et al.,  
379 2013) or vein (PI3K/AKT) (Chen et al., 2012; Fish and Wythe, 2015; You et al., 2005). Additional  
380 inhibitory loops between the two pathways to stabilize artery-vein identity (Hong et al., 2006).  
381 We observe a striking increased in venous MEK/ERK activation but not the adjacent dorsal aorta  
382 or intersegmental arteries of the trunk of *rasa1* mutants. While increases in pERK signaling have  
383 been previously seen in *Rasa1* mouse mutants, we are first to show the localization to the vein  
384 and that inhibition of MEK signaling prevents AVM formation. With the ectopic activation of  
385 MEK/ERK in the vein instead of the artery in *rasa1* mutants, venous programming may be  
386 disrupted, allowing for AVM formation. Over-activation of ERK in the vein may also upset  
387 angiogenesis and endothelial migration and permit the fusion of artery and vein (Shin et al.,  
388 2016; Srinivasan et al., 2009). Our data argue that the vein is particularly susceptible to



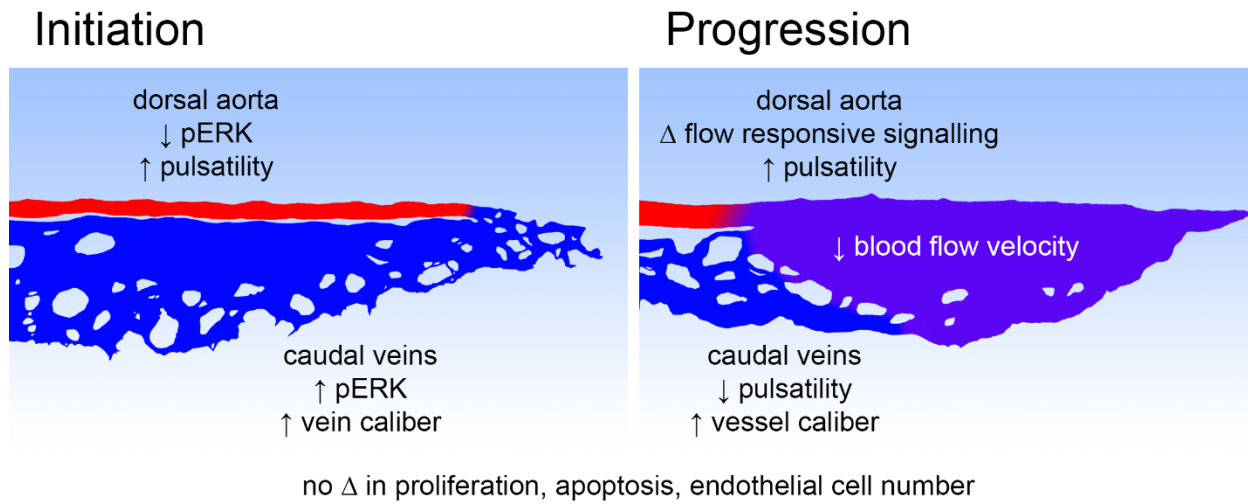

**Figure 6. Model of *rasi1* AVM initiation and progression.**

During the initiation of *rasi1* AVM formation, there is an increase in venous pERK activation, vein caliber and pulsatility in the dorsal aorta. As the AVM progressively enlarges, there continues to be high pulsatility in the aorta, a drop in pulsatility in the caudal veins and well as slow blood flow velocity in the flow return. There are changes in flow responsive signalling including a decrease in *klf2a* expression. No changes in proliferation, apoptosis or endothelial cell number appear to drive the initiation or progression of *rasi1* AVMs.

389 perturbation of *rasa1* and that ectopic MEK/ERK signaling in the vein is implicated in the  
390 initiation of *rasa1* vascular malformations as inhibition of this signaling blocks lesion formation.

391

392 Our data suggest some mechanisms through which the cavernous AVM arises. Over the  
393 window of AVM formation, we did not observe changes in endothelial cell proliferation, cell  
394 death, or endothelial cell number. Though the role of endothelial cell proliferation varies  
395 between vascular malformations, our *rasa1* data are consistent with the lack of proliferation in  
396 *Kras* AVM models (Fish et al., 2020; Nikolaev et al., 2018). However our data contrasts with the  
397 *Rasa1* mouse model, where disruption of angiogenesis results in hemorrhage and edema,  
398 apoptotic endothelial cells, vascular smooth muscle cells and cells in the lymphatic vessel valve  
399 leaflets are observed (Chen et al., 2019). In comparison, increased proliferation is seen in the  
400 vascular lesions of the *CCM3* mouse model as well as *CCM3*<sup>-/-</sup> cell culture (Bravi et al., 2015;  
401 Malinverno et al., 2019) with mixed findings from HHT models (Corti et al., 2011; Rochon et al.,  
402 2016; Roman et al., 2002; Sugden et al., 2017; Tual-Chalot et al., 2014). Differences in  
403 proliferation across vascular malformations suggest proliferation is a feature of some but not all  
404 malformations, or potentially important only certain stages of malformation development  
405 (initiation or progression).

406

407 If cell number is not changed in AVM development, other mechanisms must be at play  
408 to drive pathological vessel enlargement. Aberrant rearrangement of endothelial cells within  
409 the CVP during a critical period of remodeling could result in malformations. One potential  
410 mechanism for lesion initiation could include a collapse of the stereotypical webbed plexus into  
411 a single large tube. Previous work in the *Rasa1* mouse model has implicated the failed export  
412 and deposition of collagen IV in the vascular basement membrane in the pathology of *Rasa1*  
413 mice, which would likely impact vessel stability and could lead to plexus collapse (Chen et al.,  
414 2019). Secondly, an enlarged vessel could be the result of disrupted intussusceptive  
415 angiogenesis, where vessels are split by the formation of intraluminal pillars. This form of  
416 remodeling is critical in the development of the CVP into its mature form (Karthik et al., 2018),  
417 though the molecular mechanism driving intussusceptive angiogenesis are poorly described.  
418 Finally, a localized increase in endothelial cell size that may be driven by the interplay of  
419 genetics and altered flow signaling could help drive the progressive enlargement of the vascular  
420 malformations. Our data are consistent with *Rasa1* AVM formation involving changes at the  
421 level of cellular architecture, but further investigation is needed.

422

### 423 **Localization of *rasa1* AVMs in the venous plexus of zebrafish**

424

425 A common mechanism of vascularization in vertebrates involves the formation of an  
426 immature web of equally sized vessels in a plexus, that is then remodeled over time to produce  
427 a mature branched vascular tree (reviewed in Heinke et al., 2012). The CVP follows this vessel  
428 formation mechanisms. The posterior caudal vein sprouts ventrally between 24 and 30hpf to  
429 form a temporary plexus (Choi et al., 2011). The plexus begins to remodel at approximately  
430 48hpf, with most of the dorsal plexus vessels regressing into a single ventral vein. Why might  
431 this plexus be particularly prone to developing vascular malformations? Firstly, the CVP sits at  
432 the junction of the DA, a high-pressure vessel, which turns 180°, and splits into multiple smaller

433 vessels providing a single transition point between high velocity, high pressure vessels and a  
434 lower velocity, lower pressure venous plexus. While laminar shear stress typically promotes  
435 endothelial health, the turbulent flow at the turn-around point may sensitize this location to  
436 deformation (Chappell et al., 1998; García-Cardena et al., 2001; Mohan et al., 1997). Flow can  
437 be vasoprotective, preventing cerebral cavernous malformation (CCM) formation in the CCM1  
438 zebrafish model and the CCM2 mouse model that normally develop lesions in lowly perfused  
439 venous capillaries in the brain (Li et al., 2019; Rödel et al., 2019). Flow vasoprotection may  
440 explain why vessel beds are differentially susceptible to developing different types of vascular  
441 malformations, perhaps including *rasa1* AVMs.

442

443 Secondly, the CVP is a hematopoietic niche during early development but as  
444 hematopoietic stem cells eventually hone to the kidney niche, it is no longer needed (Xue et al.,  
445 2017). Thus, this area may be less well stabilized than other areas of the vasculature as it is a  
446 temporary structure. It is possible that the active formation and remodeling of this vessel bed  
447 makes it particularly susceptible of malformation in early development. Third, since the  
448 malformations develop at the intersection between the DA and the CVP, this could predispose  
449 the region to form malformations with any perturbations of arteriovenous specification or  
450 maintenance.

451

#### 452 **Vessel enlargement in *rasa1* mutants leads to flow abnormalities**

453

454 The AVM in *rasa1* mutants impacts flow velocity and pulsatility without impacting heart  
455 rate. At 30hpf, the velocities in the caudal vein of *rasa1* mutants are substantially increased in  
456 comparison to wildtypes as the lesion is developing. By 48hpf, the high caudal vein velocity is  
457 dampened by the cavernous malformation. We were also interested to find that velocity  
458 extremes are impacted by presence of the AVM. By 48hpf, the DA in mutants experiences  
459 higher maximal velocities and lower minimum velocities than wildtypes and more pulsatile  
460 flow. These changes would greatly alter the forces detected by endothelial cells. Altered flow  
461 patterns change mechanosensing in the endothelium, and downstream molecular signaling  
462 through regulation of flow-responsive transcription factors such as Klf2 (Dekker et al., 2002; Lee  
463 et al., 2006; Parmar et al., 2006). Indeed, we find reduced *klf2a* expression in *rasa1* mutants.  
464 Klf2-driven flow responsiveness is critical for endothelial health, with mutation of Klf2 resulting  
465 in cardiac failure in mouse and fish models (Lee et al., 2006). Other vascular malformations  
466 show changes in Klf2 expression. In CCM, the dysregulation of Klf2 suggests that changes in  
467 flow in vascular malformations can alter signaling and promote lesion progression (Li et al.,  
468 2019; Rasouli et al., 2018; Renz et al., 2015; Zhou et al., 2015; Zhou et al., 2016). Flow and flow-  
469 responsive signaling also play a role in zebrafish hereditary hemorrhagic telangiectasia (HHT)  
470 AVM models, with the development of AVMs being dependent on flow and impaired  
471 polarization seen in flow-deficient endothelial cells, resulting in larger cells and consequently  
472 larger caliber vessels (Corti et al., 2011; Sugden et al., 2017). *klf2a* expression alterations begin  
473 early in a *rasa1* mutant model, suggesting that altered flow may play a role in the progression  
474 of vascular lesions and the enlargement of malformations.

475

476 Our experiments are conducted at a stage prior to the recruitment of vascular mural  
477 cells to the aorta (or vein). Thus, the malformation develops in the absence of external  
478 stabilization. Since *rasa1* mutants have severe edema at later stages, it is not possible to test if  
479 recruitment of smooth muscle cells would help reduce pulsatility in the aorta at later  
480 timepoints (Ando et al., 2016; Stratman et al., 2017). The DA is more proximal to the heart and  
481 would be subject to more force from heart contractions. By 48hpf, the pulsatility across the DA  
482 and ventral vein becomes more consistent. In contrast, in *rasa1* mutants, the DA pulsatility  
483 remains elevated relative to the ventral vein over both timepoints and there is a significantly  
484 higher drop in pulsatility from the DA to the ventral vein. The cavernous AVM vessels acts as a  
485 damper on pulsatility, impacting flow velocity and pulsatility both up and downstream of the  
486 malformation, which would likely reduce signals for mural cell recruitment at a later stage.  
487 Changes in pulsatility from the cavernous malformation may also impact signaling that is  
488 specifically responsive to pulsatile flow (Lara et al., 2013; Shepherd et al., 2009), meaning that  
489 both changes in velocity and pulsatility could contribute to the progression and enlargement of  
490 a vascular lesion (Figure 6). Pharmacological reduction of blood pressure (and presumably shear  
491 stress) through propranolol appears to prevent the development of vascular lesions in human  
492 CCM (slow flow lesion) and promotes the resolution of infantile hemangioma (fast flow lesion)  
493 (Léauté-Labrèze et al., 2015; Li et al., 2021; Oldenburg et al., 2021; Reinhard et al., 2016).  
494 Lowering shear stress may have a protective effect against the de novo formation of vascular  
495 lesions as well as promoting the remodeling of a pre-existing lesions. Future investigations into  
496 the role of flow in the progression of fast and slow flow vascular malformations may offer  
497 further insights.

498  
499 The genetic *rasa1* mutant zebrafish model has helped us focus on the AVM component  
500 of the CM-AVM disorder, highlighting how MEK/ERK signaling, arterio-venous signaling, blood  
501 flow and pulsatility interact to correctly separate artery and vein during development. We have  
502 shown the development of cavernous vascular malformations in the tail plexus and specifically  
503 implicate the ectopic activation of venous MEK/ERK signaling in their initiation. Perturbed blood  
504 flow and pulsatility from vessel malformations likely also contribute to the progression of the  
505 lesion as downstream flow responsive signaling is altered.

## 506 **Materials and methods**

507

### 508 **Zebrafish husbandry and fish strains**

509 All experimental procedures were approved by the University of Calgary's Animal Care  
510 Committee (Protocol AC17-0189). Zebrafish embryos were maintained at 28.5°C and in E3  
511 medium (Westerfield, 1995).

512

513 Transgenic lines used include: *Tg(kdrl:mCherry)<sup>ci5</sup>* (Proulx et al., 2010), *Tg(flk:GFP)<sup>a116</sup>* (Choi et  
514 al., 2007), *Tg(gata1a:dsRed)<sup>sd2</sup>* (Traver et al., 2003).

515

516 *rasa1a<sup>ca35</sup>* and *rasa1b<sup>ca59</sup>* mutants were generated using CRISPR-Cas9 mutagenesis, following  
517 the methods outlined in Gagnon et al. 2014. Briefly, a 20-mer target with T7 promoter and  
518 constant Cas rev oligo were ordered (IDT) and annealed to synthesize sgRNA through in vitro  
519 transcription with MAXIscript T7 Transcription kit (Ambion, Cat. No. AM1312). *rasa1a<sup>ca35</sup>* and  
520 *rasa1b<sup>ca59</sup>* target sequences are listed in Supplemental Table 1. *rasa1a<sup>ca35</sup>* was created with the  
521 injection of a stop cassette, which was not injected in the creation of *rasa1b<sup>ca59</sup>* allele.

522

523 Embryos were injected at the 1-cell stage with 1uL (~200 ng/μl) sgRNA and 1uL 300 ng/μl nls  
524 Cas9 mRNA (and 1uL 10 μM stop codon cassette oligonucleotide in the case of *rasa1a<sup>ca35</sup>*). P0  
525 injected embryos were raised and outcrossed and F1 embryos were screened from mutations.  
526 Mutant alleles were cloned and sequenced from genomic DNA.

527

### 528 **Genotyping**

529 Genomic DNA (gDNA) was extracted from whole embryos as described in "PCR Sample  
530 Preparation" from ZIRC protocols (<https://zebrafish.org/wiki/protocols/genotyping>). PCR was  
531 performed with primers listed in Supplemental Table 1 and visualized on an agarose gel.

532

### 533 **Drug Treatments**

534 Embryos were dechorionated before drug treatment at 24hpf and treated until 48hpf. SL327  
535 (Sigma S4069) stock solution at 5mM concentration was heated to 65°C for at least 20 min prior  
536 to dilution to 10μM in E3 (dosage similar to Shin et al., 2016 at 15 μM at 20-30hpf). SL327 and  
537 DMSO control treatments were performed in a 24-well plate, with approximately 20 embryos  
538 per well (Supplemental Table 2).

539

### 540 **In situ hybridization**

541 In situ hybridization for *ephb4a*, *ephrinb2a* and *klf2a* were performed as previously published  
542 (Lauter et al., 2011) with some modifications. Pre-hybridization and probe hybridization were  
543 performed in 50% formamide hybridization buffer (50% formamide, 5xSSC, 5 mg/mL torula  
544 yeast RNA, 50 μg/mL heparin, 0.1% Tween-20 in water) with 5% dextran sulfate. Embryos were  
545 washed 2x 5 mins with 50% formamide, 2xSSC, 0.1% Tween-20 at 60°C, 15 mins with 2xSSC at  
546 60°C, 2x 30 mins with 0.2xSSC at 60°C and blocked with 10% non-specific sheep serum (NSS) in  
547 PBT for 1h. All ISH were performed with anti-digoxigenin F<sub>AB</sub> fragments conjugated with alkaline  
548 phosphatase in 10% NSS/PBT and probe detection was performed with NBT/BCIP were diluted  
549 in NTT (100 mM Tris (pH 9.5), 100 mM NaCl, 0.1% Tween 20 in water). Once the reaction was

550 finished, embryos were fixed for 15 mins in 4% PFA and cleared in glycerol overnight before  
551 imaging.

552

### 553 **Antibody Staining**

554 Phospho-p44/42 MAPK (ERK1/2) (Thr2020/Tyr204) antibody (Cell Signaling, #9101) staining was  
555 performed as previously published (Randlett et al., 2015).

556

### 557 **Confocal Microscopy**

558 Zebrafish were mounted on glass bottom petri dishes (MatTek, Ashland, MA, Cat. No. P50G-0-  
559 30-F), using 0.8% low melt agarose (Invitrogen (Carlsbad, CA) 16520-050) dissolved in E3 fish  
560 medium. Confocal imaging used for vessel measurements and hematocrit were obtained  
561 using a Zeiss LSM 700. All images were obtained with the 488 nm and 555 nm lasers, with  
562 a slice interval of 1-3  $\mu\text{m}$  with a 20X (NA 0.8) objective. Embryos imaged to characterize vessel  
563 morphology were anesthetized with 0.004% tricaine methanesulfonate (Sigma, A5040),  
564 whereas embryos imaged for hematocrit calculations were not anesthetized. Timelapse stacks  
565 were collected on a Zeiss LSM 700 at an interval of 15 minutes for 6 hours from 24hpf through  
566 30hpf.

567

### 568 **3D modelling of confocal images of tail vessels**

569 For modelling vessels with Simpleware ScanIP (Synopsys, 2018), high resolution confocal images  
570 were captured with using AiryScan Fast imaging on a Zeiss AiryScan LSM880 confocal  
571 microscope with an Apo 40xW (NA 1.1) objective using the Argon multiline laser for 488 nm  
572 excitation and the DPSS 561nm laser for 555 nm excitation. Slice intervals for these images  
573 were 0.25 $\mu\text{m}$ . A mask was created from the image and further refined utilizing the Gaussian  
574 filter for smoothing, island removal for RBC artefact removal, and flood fill for ensuring the  
575 model was contiguous.

576

### 577 **Image analysis for vessel morphology**

578 Images were processed using ImageJ/Fiji. Vessel diameters were measured at positions where  
579 there were no other vessels directly connecting to the vessel being measured. The vessel  
580 diameter was measured from the external diameter of the endothelium for the dorsal aorta,  
581 and internal diameter for the caudal veins due to the complex nature of this vessel bed. Three  
582 measurements were obtained across the dorsal aorta and averaged to obtain an average dorsal  
583 aorta diameter. Vein enlargement was measured as the internal diameter of the largest vessel  
584 in the caudal venous plexus. Vessel enlargement was designated as a vessel  $>1.5\times$  the average  
585 wildtype vessel. CVP and SIVP outgrowth was measured perpendicularly from the ventral side  
586 of the DA to the ventral most aspect of the CVP/SIVP. Outgrowth speed was calculated from  
587 outgrowth measurements of the same embryos at two timepoint, divided by the time between  
588 imaging.

589

### 590 **Velocity, heartrate and pulsatility measurements with MicroZebraLab**

591 Videos were taken of embryos mounted in low melt agarose without tricaine at 10x  
592 magnification and 120 fps using the MicroZebraLab apparatus created by Viewpoint Life  
593 Sciences Inc (ViewPoint Behaviour Technology, n.d.). Videos were analyzed using

594 the Zebrablood program. Videos of the heart were used to measure heartrate over a minimum  
595 of 30 seconds. The average velocity across the vessel diameter,  $\bar{u}$ , was also measured.  
596 The pulsatility index (PI), which quantifies variation in blood velocity due to the heartbeat, was  
597 calculated with equation 6. The drop in PI between the dorsal aorta and ventral vein was  
598 calculated using equation 7.

599  $PI = (\bar{u}_{max} - \bar{u}_{min}) / \bar{u}_{avg}$  (Eq. 1)

600  $PI\ Drop = (DA\ PI - VV\ PI) / DA\ PI$  (Eq. 2)

601

### 602 **Velocity heatmaps**

603 Heatmaps of the velocities along the flow path in zebrafish embryos were created by using  
604 Microsoft Excel's built-in conditional formatting and image processing via PaintTool SAI  
605 (SYSTEMAX Software Development), referencing an overlaid still image from MicroZebraLab  
606 detailing the boundaries of the measured region. The flow parameters were measured at 21 –  
607 27 different locations per embryo, depending on flow path complexity and whether quality data  
608 could be obtained in the determined locations. Average velocity heatmaps were generated  
609 using the mean velocities from multiple embryos at predetermined positions across the dorsal  
610 aorta and caudal venous plexus.

611

### 612 **Statistics**

613 GraphPad Prism8 was used to carry out all statistics. Unpaired two-tailed t-tests were used for  
614 two group comparisons and one-way ANOVAs for multiple comparisons with p-values from  
615 Sidak's multiple comparisons reported unless otherwise indicated. Paired t-tests were used  
616 when analyzing data for vessel measurements over time, or velocity measurements from the  
617 same embryo. Velocity and pulsatility data were graphed as normalized to baseline  
618 measurements unless otherwise indicated. The Chi-squared test was used for *rasa1*<sup>-/-</sup> survival.  
619 Multiple t-tests with correction for multiple comparisons using the Holm-Sidak method were  
620 used for positional velocity and pulsatility data with adjusted p-values being reported. All data  
621 are represented as mean  $\pm$  standard deviation (SD). All statistical analysis used p-values of 0.05  
622 as a cut-off for significance (p<0.05=\*, p<0.005=\*\*, p<0.0005=\*\*\*).

623

### 624 **Acknowledgements**

625

626 This study was funded by University of Calgary Cumming School of Medicine, Canadian Institutes of  
627 Health Research and Faculty of Graduate Studies studentships to JGW, a Grant in Aid from the Heart and  
628 Stroke Foundation of Canada (G-16-00012741) and CIHR Project grant funding (PJT-168938) to SJC and  
629 NSERC Discovery funding to KR. We would like to thank the Childs lab members, including Dr. Jae-Ryeon  
630 Ryu, Dr. Thomas Whitesell, Dr. Charlene Watterston, Nabila Bahrami (MSc) and Dr. Suchit Ahuja who  
631 gave thoughtful feedback throughout this project and in reviewing the manuscript.

### 632 **Competing interests**

633

634 No competing interests to declare.

Supplemental Table 1. Constructs for GuideRNA, genotyping and ISH.

| Type                 | Gene target       | Construct name            | Guide (T7 promoter-VARIABLE REGION-tracrRNA domain)                               |                        |
|----------------------|-------------------|---------------------------|-----------------------------------------------------------------------------------|------------------------|
| GuideRNA construct   | rasa1a            | rasa1 exon2_cas           | taatacagactcactataGGCGGTCGCTCTCTCTGATGgtttt agagctagaaatagcaag                    |                        |
| rasa1a stop cassette | rasa1a            | rasa1 exon2 stop cassette | acaccgggcagttacctcatgtcatggcgtttaaccttaattaagct gttgtagcagagagagcgaccgccggc       |                        |
| GuideRNA construct   | rasa1b            | rasa1b exon3_cas          | taatacagactcactataGCTGGACCGGATGATCGCAGgttt tagagctagaaatagcaag                    |                        |
| GuideRNA construct   | rasa1a and rasa1b | cas9_rvs_site             | AAAAGCACCGACTCGGTGCCACTTTTTCAAGTTGAT AACGGACTAGCCTTATTTAACTTGCTATTTCTAGCT CTA AAC |                        |
| Genotyping primer    | rasa1a            | rasa1 exon2 test f        | Primer seq (5'-3'):<br>TGTGTGCTTTTCTTTTCAGATGG                                    | Amplicon length: 138bp |
| Genotyping primer    | rasa1a            | rasa1-E2R-HRM             | Primer seq (5'-3'):<br>AAAGATAGTACGAAGGAGCCAG                                     |                        |
| Genotyping primer    | rasa1b            | rasa1b f2                 | Primer seq (5'-3'):<br>CATTGTAAATGCGCCAGAGA                                       | Amplicon length: 156bp |
| Genotyping primer    | rasa1b            | rasa1b r2 156bp           | Primer seq (5'-3'):<br>CGCTCTCTCGGATGAGGTAG                                       |                        |
| ISH probe primer     | klf2a             | klf2aF                    | GGAAGGATGAACTGGACAGG                                                              |                        |
| ISH probe primer     | klf2a             | klf2aR with T7            | AATTTAATAACGACTCACTATAGGGCGTTTAGTCCAC ATTTTCCA                                    |                        |
| ISH probe primer     | ephb4a            | EphB4a probe f            | AACACTCGTGATTCCGCGAT                                                              |                        |
| ISH probe primer     | ephb4a            | EphB4a probe r-T7         | TGTAATACGACTCACTATACGGGAAGACGGATAGTG AGCG                                         |                        |
| ISH probe primer     | ephrinb2a         |                           | 80                                                                                |                        |

Supplemental Table 2. Source and concentration of reagents

| Reagent                                                 | Company, Cat. No.     | Concentration, timing                         |
|---------------------------------------------------------|-----------------------|-----------------------------------------------|
| Phosphor-p44/42 MAPK (ERK1/2) (Thr2020/Tyr204) antibody | Cell Signaling, #9101 | 1/250, 30hpf                                  |
| SL327                                                   | Sigma, S4069          | 5µM, 24-48hpf                                 |
| Tricaine methanesulfonate                               | Sigma, A5040          | 0.004%                                        |
| DMSO                                                    | Sigma, Cat. No. D4540 | equivalent volume of small molecule inhibitor |



636 **References**

637

638 **Alsina-Sanchis, E., Garcia-Ibanez, Y., Figueiredo, A. M., Riera-Domingo, C., Figueras, A., Matias-Guiu,**  
639 **X., Casanovas, O., Botella, L. M., Pujana, M. A., Riera-Mestre, A., et al.** (2018). ALK1 loss results in  
640 vascular hyperplasia in mice and humans through PI3K activation. *Arterioscler. Thromb. Vasc. Biol.*  
641 **38**, 1216–1229.

642 **Amyere, M., Revencu, N., Helaers, R., Pairet, E., Baselga, E., Cordisco, M., Chung, W., Dubois, J.,**  
643 **Lacour, J.-P., Martorell, L., et al.** (2017). Germline Loss-of-Function Mutations in EPHB4 Cause a  
644 Second Form of Capillary Malformation-Arteriovenous Malformation (CM-AVM2) Deregulating  
645 RAS-MAPK Signaling. *Circulation* **136**, 1037–1048.

646 **Ando, K., Fukuhara, S., Izumi, N., Nakajima, H., Fukui, H., Kelsh, R. N. and Mochizuki, N.** (2016).  
647 Clarification of mural cell coverage of vascular endothelial cells by live imaging of zebrafish. *Dev.*  
648 **143**, 1328–1339.

649 **Bravi, L., Rudini, N., Cuttano, R., Giampietro, C., Maddaluno, L., Ferrarini, L., Adams, R. H., Corada,**  
650 **M., Boulday, G., Tournier-Lasserre, E., et al.** (2015). Sulindac metabolites decrease  
651 cerebrovascular malformations in CCM3-knockout mice. *Proc. Natl. Acad. Sci. U. S. A.* **112**, 8421–  
652 8426.

653 **Cai, R., Liu, F., Liu, Y., Chen, H. and Lin, X.** (2018). RASA-1 somatic “second hit” mutation in capillary  
654 malformation–arteriovenous malformation. *J. Dermatol.* **45**, 1478–1480.

655 **Chappell, D. C., Varner, S. E., Nerem, R. M., Medford, R. M. and Alexander, R. W.** (1998). Oscillatory  
656 Shear Stress Stimulates Adhesion Molecule Expression in Cultured Human Endothelium. *Circ. Res.*  
657 **82**, 532–539.

658 **Chen, X., Qin, J., Cheng, C.-M., Tsai, M.-J. and Tsai, S. Y.** (2012). COUP-TFII Is a Major Regulator of Cell  
659 Cycle and Notch Signaling Pathways. *Mol. Endocrinol.* **26**, 1268–1277.

660 **Chen, D., Teng, J. M., North, P. E., Lapinski, P. E. and King, P. D.** (2019). RASA1-dependent cellular  
661 export of collagen IV controls blood and lymphatic vascular development. *J. Clin. Invest.* **129**, 3545–  
662 3561.

663 **Choi, J., Dong, L., Ahn, J., Dao, D., Hammerschmidt, M. and Chen, J.-N.** (2007). FoxH1 negatively  
664 modulates flk1 gene expression and vascular formation in zebrafish. *Dev. Biol.* **304**, 735–44.

665 **Choi, J., Mouillesseaux, K., Wang, Z., Fiji, H. D. G., Kinderman, S. S., Otto, G. W., Geisler, R., Kwon, O.**  
666 **and Chen, J.-N.** (2011). Aplexone targets the HMG-CoA reductase pathway and differentially  
667 regulates arteriovenous angiogenesis. *Development* **138**, 1173–81.

668 **Corti, P., Young, S., Chen, C.-Y., Patrick, M. J., Rochon, E. R., Pekkan, K. and Roman, B. L.** (2011).  
669 Interaction between alk1 and blood flow in the development of arteriovenous malformations.  
670 *Development* **138**, 1573–1582.

671 **Damm, E. W. and Clements, W. K.** (2017). Pdgf signalling guides neural crest contribution to the  
672 haematopoietic stem cell specification niche. *Nat. Cell Biol.* **19**, 457–467.

673 **Dekker, R. J., Van Soest, S., Fontijn, R. D., Salamanca, S., De Groot, P. G., VanBavel, E., Pannekoek, H.**  
674 **and Horrevoets, A. J. G.** (2002). Prolonged fluid shear stress induces a distinct set of endothelial  
675 cell genes, most specifically lung Krüppel-like factor (KLF2). *Blood* **100**, 1689–1698.

- 676 **Duran, D., Karschnia, P., Gaillard, J. R., Karimy, J. K., Youngblood, M. W., DiLuna, M. L., Matouk, C. C.,**  
677 **Aagaard-Kienitz, B., Smith, E. R., Orbach, D. B., et al. (2018).** Human genetics and molecular  
678 mechanisms of vein of Galen malformation. *J. Neurosurg. Pediatr.* **21**, 367–374.
- 679 **Eerola, I., Boon, L. M., Mulliken, J. B., Burrows, P. E., Dompokmartin, A., Watanabe, S., Vanwijck, R. and**  
680 **Vikkula, M. (2003).** Capillary malformation-arteriovenous malformation, a new clinical and genetic  
681 disorder caused by RASA1 mutations. *Am. J. Hum. Genet.* **73**, 1240–9.
- 682 **Fischer, A., Schumacher, N., Maier, M., Sendtner, M. and Gessler, M. (2004).** The Notch target genes  
683 Hey1 and Hey2 are required for embryonic vascular development. *Genes Dev.* **18**, 901–11.
- 684 **Fish, J. E. and Wythe, J. D. (2015).** The molecular regulation of arteriovenous specification and  
685 maintenance. *Dev. Dyn.* **244**, 391–409.
- 686 **Fish, J. E., Flores-Suarez, C. P., Boudreau, E., Herman, A. M., Gutierrez, M. C., Gustafson, D., DiStefano,**  
687 **P. V, Cui, M., Chen, Z., Berman De Ruiz, K., et al. (2020).** Somatic Gain of KRAS Function in the  
688 Endothelium is Sufficient to Cause Vascular Malformations that Require MEK but not PI3K  
689 Signaling. *Circ. Res.* **127**, CIRCRESAHA.119.316500.
- 690 **García-Cardeña, G., Comander, J., Anderson, K. R., Blackman, B. R., Gimbrone, M. A. and Jr. (2001).**  
691 Biomechanical activation of vascular endothelium as a determinant of its functional phenotype.  
692 *Proc. Natl. Acad. Sci. U. S. A.* **98**, 4478.
- 693 **Genotyping Protocols [ZIRC Public Wiki].**
- 694 **Gerety, S. S. and Anderson, D. J. (2002).** Cardiovascular ephrinB2 function is essential for embryonic  
695 angiogenesis. *Development* **129**,.
- 696 **Gerety, S. S., Wang, H. U., Chen, Z.-F. F. and Anderson, D. J. (1999).** Symmetrical Mutant Phenotypes of  
697 the Receptor EphB4 and Its Specific Transmembrane Ligand ephrin-B2 in Cardiovascular  
698 Development. *Mol. Cell* **4**, 403–414.
- 699 **Goi, M. and Childs, S. J. (2016).** Patterning mechanisms of the sub-intestinal venous plexus in zebrafish.  
700 *Dev. Biol.* **409**, 114–128.
- 701 **Hamada, K., Oike, Y., Ito, Y., Maekawa, H., Miyata, K., Shimomura, T. and Suda, T. (2003).** Distinct roles  
702 of ephrin-B2 forward and EphB4 reverse signaling in endothelial cells. *Arterioscler. Thromb. Vasc.*  
703 *Biol.* **23**, 190–7.
- 704 **Heinke, J., Patterson, C. and Moser, M. (2012).** Life is a pattern: vascular assembly within the embryo.  
705 *Front. Biosci. (Elite Ed).* **4**, 2269–88.
- 706 **Henkemeyer, M., Rossi, D. J., Holmyard, D. P., Puri, M. C., Mbamalu, G., Harpal, K., Shih, T. S., Jacks, T.**  
707 **and Pawson, T. (1995).** Vascular system defects and neuronal apoptosis in mice lacking Ras  
708 GTPase-activating protein. *Nature* **377**, 695–701.
- 709 **Heuchan, A., Joss, S., Berg, J., Suri, M. and Bhattacharya, J. (2013).** G25 RASA1 Mutations and Vein of  
710 Galen Arterial Malformations. *Arch. Dis. Child.* **98**, A16–A17.
- 711 **Hong, C. C., Peterson, Q. P., Hong, J.-Y. and Peterson, R. T. (2006).** Artery/Vein Specification Is  
712 Governed by Opposing Phosphatidylinositol-3 Kinase and MAP Kinase/ERK Signaling. *Curr. Biol.* **16**,  
713 1366–1372.
- 714 **Iriarte, A., Figueras, A., Cerdà, P., Mora, J. M., Jucglà, A., Penín, R., Viñals, F. and Riera-Mestre, A.**

- 715 (2019). PI3K (Phosphatidylinositol 3-Kinase) Activation and Endothelial Cell Proliferation in Patients  
716 with Hemorrhagic Hereditary Telangiectasia Type 1. *Cells* **8**,.
- 717 **Karthik, S., Djukic, T., Kim, J. D., Zuber, B., Makanya, A., Odriozola, A., Hlushchuk, R., Filipovic, N., Jin,**  
718 **S. W. and Djonov, V.** (2018). Synergistic interaction of sprouting and intussusceptive angiogenesis  
719 during zebrafish caudal vein plexus development. *Sci. Rep.* **8**, 1–15.
- 720 **Kawasaki, J., Aegerter, S., Fevurly, R. D., Mammoto, A., Mammoto, T., Sahin, M., Mably, J. D.,**  
721 **Fishman, S. J. and Chan, J.** (2014). RASA1 functions in EPHB4 signaling pathway to suppress  
722 endothelial mTORC1 activity. **124**,.
- 723 **Lapinski, P. E., Kwon, S., Lubeck, B. A., Wilkinson, J. E., Srinivasan, R. S., Sevick-Muraca, E. and King, P.**  
724 **D.** (2012). RASA1 maintains the lymphatic vasculature in a quiescent functional state in mice. *J.*  
725 *Clin. Invest.* **122**, 733–47.
- 726 **Lapinski, P. E., Doosti, A., Salato, V., North, P., Burrows, P. E. and King, P. D.** (2018). Somatic second hit  
727 mutation of RASA1 in vascular endothelial cells in capillary malformation-arteriovenous  
728 malformation. *Eur. J. Med. Genet.* **61**, 11–16.
- 729 **Lara, G. G., Hazenbiller, O., Gareau, T., Shepherd, R. D., Kallos, M. S., Rancourt, D. E. and Rinker, K. D.**  
730 (2013). Fluid flow modulation of murine embryonic stem cell pluripotency gene expression in the  
731 absence of LIF. *Cell. Mol. Bioeng.* **6**, 335–345.
- 732 **Lauter, G., Söll, I. and Hauptmann, G.** (2011). Two-color fluorescent in situ hybridization in the  
733 embryonic zebrafish brain using differential detection systems. *BMC Dev. Biol.* **11**, 1–11.
- 734 **Lawson, N., Scheer, N., Pham, V. N., Kim, C. H., Chitnis, A. B., Campos-Ortega, J. A. and Weinstein, B.**  
735 **M.** (2001). Notch signaling is required for arterial-venous differentiation during embryonic vascular  
736 development. *Development* **128**, 3675–83.
- 737 **Lawson, N., Vogel, A. and Weinstein, B.** (2002). sonic hedgehog and vascular endothelial growth factor  
738 act upstream of the Notch pathway during arterial endothelial differentiation. *Dev. Cell* **3**, 127–36.
- 739 **Léauté-Labrèze, C., Hoeger, P., Mazereeuw-Hautier, J., Guibaud, L., Baselga, E., Posiunas, G., Phillips,**  
740 **R. J., Caceres, H., Lopez Gutierrez, J. C., Ballona, R., et al.** (2015). A Randomized, Controlled Trial of  
741 Oral Propranolol in Infantile Hemangioma. *N. Engl. J. Med.* **372**, 735–746.
- 742 **Lee, J. S., Yu, Q., Shin, J. T., Sebzda, E., Bertozzi, C., Chen, M., Mericko, P., Stadtfeld, M., Zhou, D.,**  
743 **Cheng, L., et al.** (2006). Klf2 Is an Essential Regulator of Vascular Hemodynamic Forces In Vivo. *Dev.*  
744 *Cell* **11**, 845–857.
- 745 **Li, J., Zhao, Y., Coleman, P., Chen, J., Ting, K. K., Choi, J. P., Zheng, X., Vadas, M. A. and Gamble, J. R.**  
746 (2019). Low fluid shear stress conditions contribute to activation of cerebral cavernous  
747 malformation signalling pathways. *Biochim. Biophys. Acta - Mol. Basis Dis.* **1865**, 165519.
- 748 **Li, W., Shenkar, R., Detter, M. R., Moore, T., Benavides, C., Lightle, R., Girard, R., Hobson, N., Cao, Y.,**  
749 **Li, Y., et al.** (2021). Propranolol inhibits cavernous vascular malformations by  $\beta$ 1 adrenergic  
750 receptor antagonism in animal models. *J. Clin. Invest.* **131**,.
- 751 **Lubeck, B. A., Lapinski, P. E., Bauler, T. J., Oliver, J. A., Hughes, E. D., Saunders, T. L. and King, P. D.**  
752 (2014). Blood vascular abnormalities in Rasa1(R780Q) knockin mice: implications for the  
753 pathogenesis of capillary malformation-arteriovenous malformation. *Am. J. Pathol.* **184**, 3163–9.

- 754 **Macmurdo, C. F., Wooderchak-Donahue, W., Bayrak-Toydemir, P., Le, J., Wallenstein, M. B., Milla, C.,**  
755 **Teng, J. M. C., Bernstein, J. A. and Stevenson, D. A.** (2016). *RASA1* somatic mutation and variable  
756 expressivity in capillary malformation/arteriovenous malformation (CM/AVM) syndrome. *Am. J.*  
757 *Med. Genet. Part A* **170**, 1450–1454.
- 758 **Malinverno, M., Maderna, C., Abu Taha, A., Corada, M., Orsenigo, F., Valentino, M., Pisati, F., Fusco,**  
759 **C., Graziano, P., Giannotta, M., et al.** (2019). Endothelial cell clonal expansion in the development  
760 of cerebral cavernous malformations. *Nat. Commun.* **10**, 1–16.
- 761 **Mohan, S., Mohan, N. and Sprague, E.** (1997). Differential activation of NF-kappa B in human aortic  
762 endothelial cells conditioned to specific flow environments. *Am. J. Physiol.* **273**,
- 763 **Nikolaev, S. I., Vetiska, S., Bonilla, X., Boudreau, E., Jauhiainen, S., Rezai Jahromi, B., Khyzha, N.,**  
764 **DiStefano, P. V., Suutarinen, S., Kiehl, T.-R., et al.** (2018). Somatic Activating *KRAS* Mutations in  
765 Arteriovenous Malformations of the Brain. *N. Engl. J. Med.* **378**, 250–261.
- 766 **Ola, R., Dubrac, A., Han, J., Zhang, F., Fang, J. S., Larrivé, B., Lee, M., Urarte, A. A., Kraehling, J. R.,**  
767 **Genet, G., et al.** (2016). PI3 kinase inhibition improves vascular malformations in mouse models of  
768 hereditary haemorrhagic telangiectasia. *Nat. Commun.* **7**, 1–12.
- 769 **Oldenburg, J., Malinverno, M., Globisch, M. A., Maderna, C., Corada, M., Orsenigo, F., Conze, L. L.,**  
770 **Rorsman, C., Sundell, V., Arce, M., et al.** (2021). Propranolol Reduces the Development of Lesions  
771 and Rescues Barrier Function in Cerebral Cavernous Malformations. *Stroke* **52**,
- 772 **Parmar, K. M., Larman, H. B., Dai, G., Zhang, Y., Wang, E. T., Moorthy, S. N., Kratz, J. R., Lin, Z., Jain, M.**  
773 **K., Gimbrone, M. A., et al.** (2006). Integration of flow-dependent endothelial phenotypes by  
774 Kruppel-like factor 2. *J. Clin. Invest.* **116**, 49–58.
- 775 **Proulx, K., Lu, A. and Sumanas, S.** (2010). Cranial vasculature in zebrafish forms by angioblast cluster-  
776 derived angiogenesis. *Dev. Biol.* **348**, 34–46.
- 777 **Randlett, O., Wee, C. L., Naumann, E. A., Nnaemeka, O., Schoppik, D., Fitzgerald, J. E., Portugues, R.,**  
778 **Lacoste, A. M. B., Riegler, C., Engert, F., et al.** (2015). Whole-brain activity mapping onto a  
779 zebrafish brain atlas. *Nat. Methods* **12**, 1039–1046.
- 780 **Rasouli, S. J., El-Brolosy, M., Tsedeke, A. T., Bensimon-Brito, A., Ghanbari, P., Maischein, H. M.,**  
781 **Kuene, C. and Stainier, D. Y.** (2018). The flow responsive transcription factor Klf2 is required for  
782 myocardial wall integrity by modulating Fgf signaling. *Elife* **7**,
- 783 **Reinhard, M., Schuchardt, F., Meckel, S., Heinz, J., Felbor, U., Sure, U. and Geisen, U.** (2016).  
784 Propranolol stops progressive multiple cerebral cavernoma in an adult patient. *J. Neurol. Sci.* **367**,  
785 15–17.
- 786 **Ren, C. G., Wang, L., Jia, X. E., Liu, Y. J., Dong, Z. W., Jin, Y., Chen, Y., Deng, M., Zhou, Y., Zhou, Y., et al.**  
787 (2013). Activated N-Ras signaling regulates arterial-venous specification in zebrafish. *J. Hematol.*  
788 *Oncol.* **6**, 1–13.
- 789 **Renz, M., Otten, C., Faurobert, E., Rudolph, F., Zhu, Y., Boulday, G., Duchene, J., Mickoleit, M.,**  
790 **Dietrich, A. C., Ramsbacher, C., et al.** (2015). Regulation of  $\beta 1$  Integrin-Klf2-Mediated Angiogenesis  
791 by CCM Proteins. *Dev. Cell* **32**, 181–190.
- 792 **Revenu, N., Boon, L. M., Mulliken, J. B., Enjolras, O., Cordisco, M. R., Burrows, P. E., Clapuyt, P.,**  
793 **Hammer, F., Dubois, J., Baselga, E., et al.** (2008). Parkes Weber syndrome, vein of Galen

- 794 aneurysmal malformation, and other fast-flow vascular anomalies are caused by RASA1 mutations.  
795 *Hum. Mutat.* **29**, 959–965.
- 796 **Rochon, E. R., Menon, P. G. and Roman, B. L.** (2016). Alk1 controls arterial endothelial cell migration in  
797 lumenized vessels. **143**, 2593–2602.
- 798 **Rödel, C. J., Otten, C., Donat, S., Lourenco, M., Fischer, D., Kuroepka, B., Paolini, A., Freund, C. and**  
799 **Abdelilah-Seyfried, S.** (2019). Blood Flow Suppresses Vascular Anomalies in a Zebrafish Model of  
800 Cerebral Cavernous Malformations. *Circ. Res.* CIRCRESAHA.119.315076.
- 801 **Roman, B. L., Pham, V. N., Lawson, N. D., Kulik, M., Childs, S., Lekven, A. C., Garrity, D. M., Moon, R. T.,**  
802 **Fishman, M. C., Lechleider, R. J., et al.** (2002). Disruption of *acvr1* increases endothelial cell  
803 number in zebrafish cranial vessels. *Development* **126**, 1571–1580.
- 804 **Shepherd, R. D., Kos, S. M. and Rinker, K. D.** (2009). Long term shear stress leads to increased  
805 phosphorylation of multiple MAPK species in cultured human aortic endothelial cells. *Biorheology*  
806 **46**, 529–538.
- 807 **Shin, M., Beane, T. J., Quillien, A., Male, I., Zhu, L. J. and Lawson, N. D.** (2016). Vegfa signals through  
808 ERK to promote angiogenesis, but not artery differentiation. *Development* **143**, 3796–3805.
- 809 **Shutter, J. R., Scully, S., Fan, W., Richards, W. G., Kitajewski, J., Deblandre, G. A., Kintner, C. R. and**  
810 **Stark, K. L.** (2000). Dll4, a novel Notch ligand expressed in arterial endothelium. *Genes Dev.* **14**,  
811 1313–8.
- 812 **Srinivasan, R., Zabuawala, T., Huang, H., Zhang, J., Gulati, P., Fernandez, S., Karlo, J. C., Landreth, G. E.,**  
813 **Leone, G. and Ostrowski, M. C.** (2009). Erk1 and erk2 regulate endothelial cell proliferation and  
814 migration during mouse embryonic angiogenesis. *PLoS One* **4**, e8283.
- 815 **Stratman, A. N., Pezoa, S. A., Farrelly, O. M., Castranova, D., Dye, L. E., Butler, M. G., Sidik, H., Talbot,**  
816 **W. S. and Weinstein, B. M.** (2017). Interactions between mural cells and endothelial cells stabilize  
817 the developing zebrafish dorsal aorta. *Dev.* **144**, 115–127.
- 818 **Sugden, W. W., Meissner, R., Aegerter-Wilmsen, T., Tsaryk, R., Leonard, E. V., Bussmann, J., Hamm, M.**  
819 **J., Herzog, W., Jin, Y., Jakobsson, L., et al.** (2017). Endoglin controls blood vessel diameter through  
820 endothelial cell shape changes in response to haemodynamic cues. *Nat. Cell Biol.* **19**, 653–665.
- 821 **Swift, M. R., Pham, V. N., Castranova, D., Bell, K., Poole, R. J. and Weinstein, B. M. B. M.** (2014). SoxF  
822 factors and Notch regulate *nr2f2* gene expression during venous differentiation in zebrafish. *Dev.*  
823 *Biol.* **390**, 116–125.
- 824 **SYSTEMAX Software Development - PaintTool SAI.**
- 825 **Thisse, B., Pflumio, S., Furthauer, M., Loppin, B., Heyer, V., Degrave, A., Woehl, R., Lux, A., Steffan, T.,**  
826 **Chardonnier, X., et al.** (2001). Expression of the zebrafish genome during embryogenesis. *Zfin*  
827 *Direct Submiss.* ZDB-PUB-01,.
- 828 **Traver, D., Paw, B. H., Poss, K. D., Penberthy, W. T., Lin, S. and Zon, L. I.** (2003). Transplantation and in  
829 vivo imaging of multilineage engraftment in zebrafish bloodless mutants. *Nat. Immunol.* **4**, 1238–  
830 1246.
- 831 **Tual-Chalot, S., Mahmoud, M., Allinson, K. R., Redgrave, R. E., Zhai, Z., Oh, S. P., Fruttiger, M. and**  
832 **Arthur, H. M.** (2014). Endothelial depletion of *Acvr1* in mice leads to arteriovenous malformations

- 833 associated with reduced endoglin expression. *PLoS One* **9**, e98646.
- 834 **Wang, H. U., Chen, Z. F. and Anderson, D. J.** (1998). Molecular distinction and angiogenic interaction  
835 between embryonic arteries and veins revealed by ephrin-B2 and its receptor Eph-B4. *Cell* **93**, 741–  
836 53.
- 837 **Westerfield, M.** (1995). *The Zebrafish Book: A Guide for the Laboratory Use of Zebrafish (Danio Rerio)*.  
838 University of Oregon Press.
- 839 **Wythe, J., Dang, L., Devine, W., Boudreau, E., Artap, S., He, D., Schachterle, W., Stainier, D., Oettgen,**  
840 **P., Black, B., et al.** (2013). ETS factors regulate Vegf-dependent arterial specification. *Dev. Cell* **26**,  
841 45–58.
- 842 **Xue, Y., Lv, J., Zhang, C., Wang, L., Ma, D. and Liu, F.** (2017). The Vascular Niche Regulates  
843 Hematopoietic Stem and Progenitor Cell Lodgment and Expansion via *klf6a-ccl25b*. *Dev. Cell* **42**,  
844 349-362.e4.
- 845 **You, L.-R., Lin, F.-J., Lee, C. T., DeMayo, F. J., Tsai, M.-J. and Tsai, S. Y.** (2005). Suppression of Notch  
846 signalling by the COUP-TFII transcription factor regulates vein identity. *Nature* **435**, 98–104.
- 847 **Zhou, Z., Rawnsley, D. R., Goddard, L. M., Pan, W., Cao, X. J., Jakus, Z., Zheng, H., Yang, J., Arthur, J. S.**  
848 **C., Whitehead, K. J., et al.** (2015). The Cerebral Cavernous Malformation Pathway Controls Cardiac  
849 Development via Regulation of Endocardial MEKK3 Signaling and KLF Expression. *Dev. Cell* **32**, 168–  
850 180.
- 851 **Zhou, Z., Tang, A. T., Wong, W. Y., Bamezai, S., Goddard, L. M., Shenkar, R., Zhou, S., Yang, J., Wright,**  
852 **A. C., Foley, M., et al.** (2016). Cerebral cavernous malformations arise from endothelial gain of  
853 MEKK3-KLF2/4 signalling. *Nature* **532**, 122–126.
- 854

Video 1. High speed video imaging of blood flow through the dorsal aorta and caudal venous plexus of a laterally mounted wildtype embryo at 30hpf.

Video 2. High speed video imaging of blood flow through the dorsal aorta and caudal venous plexus of a laterally mounted *rasa1*<sup>-/-</sup> embryo at 30hpf.

Video 3. High speed video imaging of blood flow through the dorsal aorta and caudal venous plexus of a laterally mounted wildtype embryo at 48hpf.

Video 4. High speed video imaging of blood flow through the dorsal aorta and caudal venous plexus of a laterally mounted *rasa1*<sup>-/-</sup> embryo at 48hpf.

Video 5. Timelapse confocal imaging of the developing caudal venous plexus of a laterally mounted wildtype *Tg(kdrl:mCherry)* embryo from 24-30hpf. Imaging was performed with 15 min intervals and shown at 2fps.

Video 6. Timelapse confocal imaging of the developing caudal venous plexus of a laterally mounted *rasa1*<sup>-/-</sup> *Tg(kdrl:mCherry)* embryo from 24-30hpf. Imaging was performed with 15 min intervals and shown at 2fps. Note the cavernous AVM at the posterior of the tail, partially filled with stagnant blood.
